# Supplementary material for: The Drosophila mitotic spindle orientation machinery requires activation, not just localization
Source: PubMed Central journal article supplement — EMBO Rep. 2023 Jan 11;24(3):e56074. doi: 10.15252/embr.202256074 (PMC9986814; doi:10.15252/embr.202256074), 2023-01-11
Supplement: EMBR-24-e56074-s001.pdf [file EMBR-24-e56074-s001.pdf]

## **Appendix**

This appendix contains information concerning the generation of Pins:Tom *Drosophila* line.

### **Table of Contents**

**Page 2..... Appendix Figure S1**

**Page 3-7..... Appendix Supplementary Methods: Plasmid sequence**

**Appendix Figure S1**  
Plasmid

Created by SnapGene

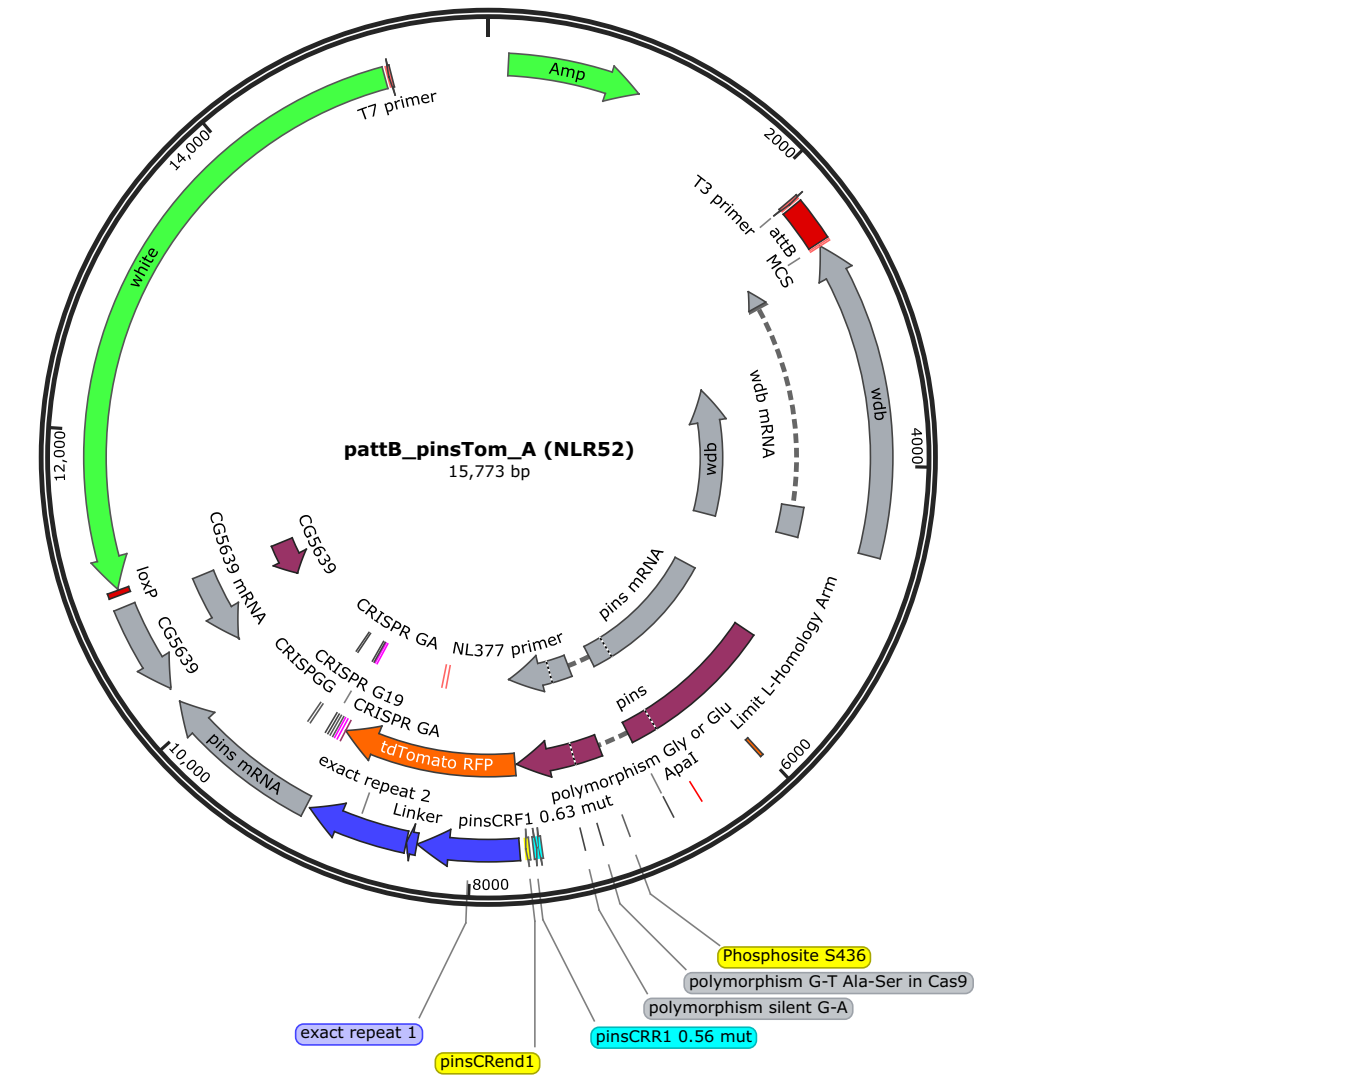

**Appendix Supplementary Methods:  
Plasmid sequence****Full pins + linker + tdTomato sequence:**

atgtcctcgtctctcgtcgcgagagaatgtgtccagtttgggactgggatcgggagggaggaggaactacttcccacgacggcaact  
cccagcaggggtccggatccgacggaggatccagatgtgcctggaactggccctcgaggggtaacgcctctgcaaggcgggtgac  
tgccgggagggcgtggccttctccaggcggcattcaggccggaaccgaggatcttgcactctgtccgcatctactcccagctgg  
gcaacgcctactctacctagggcactacaacaaggcagatgcagtaccacaacacgatcttacgctggccaagagcatgaacga  
ccgactgggagggccaagtctctggcaatctgggcaacaccctcaaggaatgggtcgcttcgacgagggcggccatctgttgcga  
gaggcacctaacgctggcaggcagctgggagatcgtctgtccgagggagcgcctcttacaacctaggaaatgttaccacgcca  
agggcaagcacttgggtcagagaaacctggaaagttcggcgacgatgtcaaggaggcgtcaccctgcccgtggagtttaccag  
gagaatctgaagctcatgcccgatctgggtgatcgtggtgctcaaggctcgagctgtggaatctgggaaatacctactactactagg  
cgattccaagcggccattgagcatcatcaggagcagctgcgacttccagagaggttgggtgatcgcgaggctgagcgaaggcca  
acagtaatcttggcaactcgcacatattcctgggacaattcgaggacgcccgaacactacaaacgcaccttggcttggccgttga  
gttgggtgaacggaagtggaggcccagagttgctacagcttgggcaacacctacagcttctgcacgagttcaacactgcatcga  
gtatcacaatcgacacttggcattgccaggagttgggagatcgaattggtagggccagggcctgctggtcactgggcaatgccca  
ctctgccatcgggtgcatgagcgggcccctaaagatgcccgaacagcacttcaactggccaaggagctgcacgaccgggtgggtg  
aaagcacagccagggtgaacatctccgatctacgaaagctactcggaaatgccgactccgagccttaccaccaggaggagg  
ctcgtaccaccgctccgatcactcggccagcggaaatcagtcggatggatcggagaactcgcaaggaagaatggtaagagaaa  
cgagctgcaacaacataagcaatatgaatgattcctgagatatttttaacaatactggcagtcggttgttctattttcgaagtggaca  
cctgctgctgagctgttggcccttattgttagcgtaaatatttatacttgtaccaaaacacatcgttaaacttctgattcgagcacatgctg  
agaaattgaaaccctgaaagatacatagctaaatttactttaattgcttcccgtcaggtgagcgttctgctgcagagcatggagca  
gttggacctgatcaagatcactcccgatggaagcgcagatcaggaggaaaagctacgagcacaggcgaccaggaaagccaaag  
acgacgacttttccgagatgcttccggtcgcagtcgaagcgcagtgatgaccagcgttctgatcaaggtaatcccgcgggagc  
tccggcgggtggcactggcgcacgcgtaagccgctgtgagcagaactcgttctgctggtatcccaccaacctgctggcctcaag  
tcaccgctcgtcggcgaatccatcagccattggacatggccgctcgcaggagcgcaccactacgcagcagcccgatgatgactt  
cctagacatgcttatgctgccaaggctcgcgtctggaggagcagcgggtccgagttaccgcgcccctaatgtccatggagcag  
aggcggaggcaccaccgcatccgtcccagaggctgctgttccaggggaccacgcggacagaccggagctggagctaccgctcc  
ccgatgaggacttcttactgatcatgaaggtccagagcggctgTatggaAgatcagcgcTtcCattccgttccgaaatgcca  
acaataacaacaatagccgcagcaacaacaacggttCAGCCGGCGGAGCTGGAAAGggaggtagtggtGTGA  
GCAAGGGCGAGGAGGTCATCAAAGAGTTCATGCGCTTCAAGGTGCGCATGGAGGGCTCC  
ATGAACGGCCACGAGTTCGAGATCGAGGGCGAGGGCGAGGGCCGCCCTACGAGGGCA  
CCCAGACCGCCAAGCTGAAGGTGACCAAGGGCGGCCCCCTGCCCTTCGCCTGGGACATC  
CTGTCCCCCAGTTCATGTACGGCTCCAAGGCGTACGTGAAGCACCCCGCCGACATCCCC  
GATTACAAGAAGCTGTCCTTCCCCGAGGGCTTCAAGTGGGAGCGCGTGATGAACTTCGAG  
GACGGCGGTCTGGTGACCGTGACCCAGGACTCCTCCCTGCAGGACGGCACGCTGATCTA  
CAAGGTGAAGATGCGCGGCACCAACTTCCCCCCGACGGCCCCGTAATGCAGAAGAAGA  
CCATGGGCTGGGAGGCCTCCACCGAGCGCCTGTACCCCGCGACGGCGTGCTGAAGGG  
CGAGATCCACCAGGCCCTGAAGCTGAAGGACGGCGGCCACTACCTGGTGGAGTTCAAGA  
CCATCTACATGGCCAAGAAGCCCGTGCAACTGCCCGGCTACTACTACGTGGACACCAAGC  
TGACATCACCTCCACAACGAGGACTACACCATCGTGGAACAGTACGAGCGCTCCGAGG  
GCCGCCACCACCTGTTCTGGGGCATGGCACCGGCAGCACCGGCAGCGGCAGCTCCGG  
CACCGCCTCCTCCGAGGACAACAACATGGCCGTCATCAAAGAGTTCATGCGCTTCAAGGT  
GCGCATGGAGGGCTCCATGAACGGCCACGAGTTCGAGATCGAGGGCGAGGGCGAGGGC  
CGCCCCACGAGGGCACCCAGACCGCCAAGCTGAAGGTGACCAAGGGCGGCCCCCTGCC  
CTTCGCCTGGGACATCCTGTCCCCCAGTTCATGTACGGCTCCAAGGCGTACGTGAAGCA  
CCCCGCCGACATCCCCGATTACAAGAAGCTGTCTTCCCCGAGGGCTTCAAGTGGGAGCG  
CGTGATGAACTTCGAGGACGGCGGTCTGGTGACCGTGACCCAGGACTCCTCCCTGCAGG  
ACGGCACGCTGATCTACAAGGTGAAGATGCGCGGCACCAACTTCCCCCCGACGGCCCC  
GTAATGCAGAAGAAGACCATGGGCTGGGAGGCCTCCACCGAGCGCCTGTACCCCGCGA  
CGGCGTGCTGAAGGGCGAGATCCACCAGGCCCTGAAGCTGAAGGACGGCGGCCACTACC

TGGTGGAGTTCAAGACCATCTACATGGCCAAGAAGCCCGTGCAACTGCCCGGCTACTACT  
 ACGTGGACACCAAGCTGGACATCACCTCCCACAACGAGGACTACACCATCGTGGAAACAGT  
 ACGAGCGCTCCGAGGGCCGCCACCACCTGTTCTGTACGGCATGGACGAGCTGTACAAG

**pattB sequence:**

GTGGCACTTTTCGGGGAAATGTGCGCGGAACCCCTATTTGTTTATTTTTCTAAATACATTCA  
 AATATGTATCCGCTCATGAGACAATAACCCTGATAAATGCTTCAATAATATTGAAAAAGGAA  
 GAGTATGAGTATTCAACATTTCCGTGTCGCCCTTATTCCCTTTTTTTCGGGCATTTTGCCTTC  
 CTGTTTTTGTCCACCCAGAAACGCTGGTGAAAGTAAAAGATGCTGAAGATCAGTTGGGTGC  
 ACGAGTGGGTTACATCGAACTGGATCTCAACAGCGGTAAGATCCTTGAGAGTTTTCGCCCC  
 GAAGAACGTTTTCCAATGATGAGCACTTTTAAAGTTCTGCTATGTGGCGCGGTATTATCCC  
 GTATTGACGCCGGGCAAGAGCAACTCGGTCGCCGCATACACTATTCTCAGAATGACTTGG  
 TTGAGTACTCACCAGTCACAGAAAAGCATCTTACGGATGGCATGACAGTAAGAGAATTATG  
 CAGTGCTGCCATAACCATGAGTGATAAACTGCGGCCAACTTACTTCTGACAACGATCGGA  
 GGACCGAAGGAGCTAACCCTTTTTTGCACAACATGGGGGATCATGTAACCTGCCTTGATC  
 GTTGGGAACCGGAGCTGAATGAAGCCATACCAAACGACGAGCGTGACACCACGATGCCTG  
 TAGCAATGGCAACAACGTTGCGCAAACATTAACCTGGCGAACTACTTACTCTAGCTTCCCG  
 GCAACAATTAATAGACTGGATGGAGGCGGATAAAGTTGCAGGACCACTTCTGCGCTCGGC  
 CCTTCCGGCTGGCTGGTTTATTGCTGATAAATCTGGAGCCGGTGAGCGTGGGTCTCGCGG  
 TATCATTGCAGCACTGGGGCCAGATGGTAAGCCCTCCCGTATCGTAGTTATCTACACGACG  
 GGGAGTCAGGCAACTATGGATGAACGAAATAGACAGATCGCTGAGATAGGTGCCTCACTG  
 ATTAAGCATTGGTAACTGTCAGACCAAGTTTACTCATATATACTTTAGATTGATTTAAACTT  
 CATTTTTAATTTAAAAGGATCTAGGTGAAGATCCTTTTTGATAATCTCATGACCAAATCCCT  
 TAACGTGAGTTTTTCGTTCCACTGAGCGTCAGACCCCGTAGAAAAGATCAAAGGATCTTCTT  
 GAGATCCTTTTTTTCTGCGCGTAATCTGCTGCTTGCAAACAAAAAACACCGCTACCAGC  
 GGTGGTTTTGTTGCCGGATCAAGAGCTACCAACTCTTTTTCCGAAGGTAACCTGGCTTCAGC  
 AGAGCGCAGATACCAAATACTGTCCTTCTAGTGTAGCCGTAGTTAGGCCACCACTTCAAGA  
 ACTCTGTAGCACCCGCTACATACCTCGCTCTGCTAATCCTGTTACCAGTGGCTGCTGCCAG  
 TGGCGATAAGTCGTGTCTTACCGGGTTGGACTCAAGACGATAGTTACCGGATAAGGCGCA  
 GCGGTCCGGGCTGAACGGGGGGTTTCGTGCACACAGCCCAGCTTGGAGCGAACGACCTACA  
 CCGAACTGAGATACCTACAGCGTGAGCTATGAGAAAGCGCCACGCTTCCCAGAGGGAGAA  
 AGGCGGACAGGTATCCGGTAAGCGGCAGGGTTCGGAACAGGAGAGCGCACGAGGGAGCT  
 TCCAGGGGGAAACGCCTGGTATCTTTATAGTCTGTGCGGGTTTCGCCACCTCTGACTTGAG  
 CGTCGATTTTTGTGATGCTCGTCAGGGGGGCGGAGCCTATGGAAAACGCCAGCAACGCG  
 GCCTTTTTACGTTTCTGGCCTTTTGTGCTGACATGTTCTTTCTGCGTTATC  
 CCCTGATTCTGTGGATAACCGTATTACCGCCTTTGAGTGAGCTGATACCGCTCGCCGACG  
 CGAACGACCGAGCGCAGCGAGTCAGTGAGCGAGGAAGCGGAAGAGCGCCCAATACGCAA  
 ACCGCCTCTCCCCGCGCGTTGGCCGATTATTAATGCAGCTGGCACGACAGGTTTCCCGA  
 CTGGAAAGCGGGCAGTGAGCGCAACGCAATTAATGTGAGTTAGCTCACTCATTAGGCACC  
 CCAGGCTTTACACTTTATGCTTCCGGCTCGTATGTTGTGTGGAATTGTGAGCGGATAACAA  
 TTTCACACAGGAAACAGCTATGACCATGATTACGCCAAGCTCGAAATTAACCCTCACTAAA  
 GGGAAACAAAAGCTGGCTAGAAGTGTGTCGACATGCCCGCCGTGACCGTCGAGAACCCG  
 CTGACGCTGCCCGCGTATCCGCACCCGCGGACGCGGTCGCACGTCCCGTGCTCACCGT  
 GACCACCGCGCCAGCGGTTTCGAGGGCGAGGGCTTCCCGGTGCGCCGCGCGTTCCGCC  
 GGGATCAACTACCGCCACCTCGACCCGTTTCATCATGATGGACCAGATGGGTGAGGTGGAG  
 TACGCGCCCGGGGAGCCCAAGGGCACGCCCTGGCACCCGCACCGCGGCTTCGAGACCG  
 TGACCTACATCGTCGACACTAGTGGATCTCTAGAGGTACcctcgtctcctgatctcagttttcagtttcag  
 tttggttttcggtttcggctctcgcgtttgcttacgctcacggagatgcttttctcgttttatctttgctttgctggcgggttagcgctgctgctggt  
 ttcactgtggatgtgtgatagcagttggcataattgaattagaactgtagttcacgagagaattttgcacaacgcatcgcgcggttgga  
 ggggggtgtcgaatgggaggggggggggggggctgtgtgtccaagtggggtcaacacatgtaaatgcggtgcaaagcaaaatac  
 acaaagatcttaatggcgaactgtgtgagtgagtggggctcactttggggaatgggagaagcgtagaatgtgaatgggtagag

agagaggatgggaagatgagtaaaaggtagagagcgagctgtttgatggggcttttcgctgttgcctttgctctatcttttgctcac  
ttcggttgtgattccttcatctatctttgcttttctcatttaggtaagaggagtaagattagtaactgtgtctatgaacataattctaac  
acatttactgcttgacacacacacttatcataaatatgtatgttcaaacacacacacaggcacacacactcgggtgagagagaca  
cacacacgcacgcggcacaanaatcgatattctaaaaataataagtaaaaaatataatgctcacaacttaaccgattgcgtg  
cgtgtattgtgtgctgtgtgtgtgcgggctggctggattgcgagcgaattacatatttatttatttataaaactttgaaacaccgaatt  
gctgtggggattagccgcttactgcgacttgaaaaattgcattgccttgaaattggcttaatttgcactcggcttgttagttgcct  
ttatttctcttcttattcgggcttgaatttgcctgcagaatttataaaaaccgactgcgtatgtgtgtatataaaaagattctatactttgc  
aaccgacgacgaaggcggcacaacggcaactgtggcgatatttttctcctcgcgactctcgcgctctcttttcggttcggctgctctct  
ggcacaatgggtatatactatacgcgagaggagcaggcacacacaaaacgaaaagcctgcctcaattgattagtagtacttgcga  
atagtagtactattgtattgtttcatctagctgacttcaattgtttggctgataatttagctagattcccagggtgcgattactcattggctttg  
ttcgagaccactgtccagatttctgggtgagagcgtggtgagttcgttcaactcaccacagaaaactgtgtgctgcgctgcgctctct  
atttaggcggctctcccacacacggctcacaactacagctccaaaaatgaatgaaaataccacaaaataccatccaacgcacgggc  
acaccggcgaactgaaagacgcgctgtttcaagttttctcccgttttatttctatcagggcgataaccaaaacaaggctatcggtat  
cgacctcgcctcgtctgtatcccctctccctgctgcactcgcctctctttgtgtggtaatttttcttttagtcttttctgggtgccttctg  
agaaattccctgctttagtaatttagaacacaatgtttgctgactgttggccgactgcagctgaaaaccgcacaaaaaaagcgac  
gcacacacacacctcgagcatccggactccaattgactgcttttcaacagctctatcgcgacgcactgccacaattcaccgctt  
atcgcgcccgaatattgggacgttgcctttcaatcgattttgtaaccggcaggtgcgctttagcagagaattacgaattttctccagcggc  
aactagaatcgttcacacagacaccgtagaagtgcgcatctttgaagcgattaggttgcagagcgcctgcaaaagtgcgtggt  
accaactacggtgatagggatgagggctatggctgttaccgaaaatgataaattgtaactatgcaataatatttagatttactaata  
cgttcaaaaaataagaaaagactatgataaattgttttagcttggctcataagtagtctttataagctatggcttgcagtggtta  
acatttctcaaatagggcaacctctgataagatttcaattcgaattctaataaatgaattaaactgcttttctaaagttaaaaaaaa  
ttagtttaaatcaaacggcatgcatacattaacctcaacaatgaattatataataatattaccaattgggctactaaatattgctgat  
atgtaagctatggtcatgaggtaaggcatattattatataatttcatagtagtctttgttaggggaaaaataacaagtaattaaaattgt  
tcaattgacttaaaacaaaataacagatatttttaataccaacgacataccatataaagtggattttcttaactcgttggattct  
catcgacccaatcggTAGagagttgtagtcaaaaagctgaagccaacaaacaatcctataatccatccctggccgcagctc  
ctgactcatttctgtgaagccatctgcccatttattcagctgctttttcgaaattggctgtaaacattttgtctttacaagattata  
tatacacacgtacacgaaaagcattaattatgaatagcaactaaccacgtaaccaatattaggggtgatagggcctcgtctacac  
gagcagagggaggaacctccaacggatgcacacactcatcactcatgactcattacatactccacatgagctggccatgatattg  
aacgatatgcactcagacttactgatattaacgttttaattgcatgtgcaagtagtttaagccggataatactaataatccaatttgc  
caatagacggaaccaagtcttctacgatcaacgatcttactctgtagccacattcagctaaatattaagtttaagttcatcgaac  
ccactctacatgtaagcaatgcattttcaaatcaaaatctaactacagatataccaattgtaactatgagtagtattgcttttctatcaatcta  
tcgatcgtatcaaacctgaacatatttaagccacttacaattttgttagtagatataacaagacacaaagaatagcagctcggaaattcca  
ttgaggaccggcgtgtgcaagcacttagcatatcacacaaccaatcacttacacatatacaagaacatatagaacaatat  
atatatagttataccaatgtctaacgatttgcctctcgggtattgttctacacaatatatacaatacaagttatatacacaaaaacaaaa  
cacaaaactgagttcagttgacgaaatgaagccaaaatttataatgttatactttttgtagcagagatctacgggatctgcgaatg  
aaagataccatacaggcggacaattatgctgtgatttataaataataaaatcaaaaaatgtttgctgacagcttgcgtatttttccaag  
ataagggtttagattcagatactaaagatcatatcagtagtgacaaaaaaagactatttctgactttaaagcttatttcat  
aaattaatcgtcttaggttgcgataagtagtgcgaaagtgggtccctctagctgcactcccctttggcttagttggggca  
gaatcaaggcctctgatctctctccccctaaaagtagatctaaatttgcctgttttattacaattgatttagataactcaacaacgga  
atgcctacgcggaaccccttctgctgtccatgtcggcggccagcagcaaaaatgggtgaggtagtccacaggctgtgcgctcc  
ttcgccttcaaatagggattcgcgcttgcgcttgcgctcagcatgacatagaccacaaatagctgaccaggaaggcgg  
aactggtggccattatgaacagcaccagctggatggactcgtcctggcgggtggccgctgagccactgggacatgagcactgcg  
tgcaaaaagtgaggcgggtcaagtcggccggaagtaccgcccggcaggcgaagtgcggcgggaaattgccgctcgtg  
gcaaaggccaagtccacttgcctcgttgcagctcaaacggacaaAAGGGCGAATTCTGCAGATATCCATC  
ACACTGGCGGCCGACAGATCTGTTAACGAATCCCAATTCCCGGATCCGCTAGCATAACTTC  
GTATAGCATACTTATACGAAGTTATGCTAGCCTAGTCCAGTGAAATCCAAGCATTTCCTA  
AATTAATGTATTCTTATTATTATAGTTGTTATTTTTGATATATATAACAACACTATTATGCC  
CACCATTTTTTTGAGATGCATCTACACAAGGAACAAACACTGGATGTCACTTTTCAGTTCAA  
TTGTAACGCTAATCACTCCGAACAGGTCACAAAAAATTACCTTAAAAAGTCATAATATTAAT  
TAGAATAAATATAGCTGTGAGGGAAATATACAAATATATTGGAGCAAATAAATTGTACATA  
CAAATATTTACTAATTTCTATTGAGACGAAATGAACCACTCGGAACCATTTGAGCGAAC

CGAATCGCGCGGAACTAACGACAGTCGCTCCAAGGTCGTCGAACAAAAGGTGAATGTGTT  
GCGGAGAGCGGGTGGGAGACAGCGAAAGAGCAACTACGAAACGTGGTGTGGTGGAGGTG  
AATTATGAAGAGGGCGCGCGATTTGAAAAGTATGTATATAAAAAATATATCCCGGTGTTTTA  
TGTAGCGATAAACGAGTTTTTGATGTAAGGTATGCAGGTGTGTAAGTCTTTTGGTTAGAAGA  
CAAATCCAAAGTCTACTTGTGGGGATGTTCGAAGGGGAAATACTTGTATTCTATAGGTCATA  
TCTTGTTTTTATTGGCACAAATATAATTACATTAGCTTTTTGAGGGGGCAATAAACAGTAAAC  
ACGATGGTAATAATGGTAAAAAACAAGCAGTTATTTCCGATATATGTCGGCTACTC  
CTTGCGTCGGGCCCCGAAGTCTTAGAGCCAGATATGCGAGCACCCGGAAGCTCACGATGAG  
AATGGCCAGACCCACGTAGTCCAGCGGCAGATCGGCGGCGGAGAAGTTAAGCGTCTCCA  
GGATGACCTTGCCCGAACTGGGGCACGTGGTGTTCGACGATGTGCAGCTAATTTCCGCCG  
GCTCCACGTCCGCCATTGGTTAATCAGCAGACCCTCGTTGGCGTAACGGAACCATGAGA  
GGTACGACAACCATTTGAGGTATACTGGCACCCGAGCCGAGTTCAAGAAGAAGCCGCCAA  
AGAGCAGGAATGGTATGATAACCGGCGGACCCACAGACAGCGCCATCGAGGTCGAGGAG  
CTGGCGCAGGATATTAGATATCCGAAGGACGTTGACACATTGGCCACCAGAGTGACCAGC  
GCCAGGCAGTTGAAGAAGTGCAGCACTCCGGCCCCGAGTCCGATCATCGGATAGGCAATC  
GCCGTGAAGACCAGTGGCACTGTGAGAAAAGCGGTAATTCGGCAATCGTTTTGCCCAGA  
AAGTATGTGTCACAGCGATAAAGTCGACTTCGGGCCTCCCTCATAAAAAGTGGCAGCTCTG  
AGGTGAACACCTAAATCGAATCGATTATTAGAAAGTTAGTAAATTATTAATATGCAAATGTA  
TTCTAAACAAGACTTACATTTATCGTGGCAAAGACGTTTTGAAAGGTGATGTTGGTCAGGAA  
GAGGAAGATGGCTCCGTTGATATTCATCACGCCACTTGCCTGAGTTGTTGGCCCAAAAAG  
ATGAGGCCAATCAAGATGGCAACCATCTGCAAATTAATGTTACTCGCATCTCATTAAATAT  
TCATATCTTCAACATGTTCCGCGAGTTAAATGAAATTTATTTATTTCTGCAAAAAGTATAACTA  
TACATCTCATTGAAAAAAGTAAAGAGGGTGTGGAATCAGGCAATTCTAACTAAAATCTAGC  
GAATTTGTTTTCCAAGAATTGTAAGCGTTATATCATTTGTTTTCCACTGGAACCACTCACCGTT  
GTCTGAATAAGTCGCACTTTTACGAGGAGTGGTTCCTTGAGCACCGACAGCCAGGATCGC  
CACAGGACCGCCCGGAACTGCATGAACCAGGTGGCCTTGTAGGTGTACCCATTCTCCGGC  
TGCTCCAGTGGCTTCTCAAATTTTTGGTGGCCAACAAGTCTCCATATCCCGGGCTACTT  
TGCTAATAGCAAATTTGTCGCATATCTTGGCGATCCGATCACGGGACTCGATCTCCCGTCC  
GGGCACAACGGCCAACACCTGTACGTAAGTCCGCCGATTGTAGTTGGTAGGACACTG  
GGCACCCACGCTGGATAGGAGTTGAGATGTAATGTAATGCTAGATACCCTTAATAACACA  
TCGAACTCACTAGGAAAAGAGTGCACGGCTTCGCTGGGAGTGCCCAAGAAAGCTACCCT  
GCCCTCGGCCATCAGAAGGATCTTGTCAAAGAGCTCAAACAGCTCGGAAGACGGCTGATG  
AATGGTCAGGATGACGGTCTTGCCCTTCTGCGACAGCTTCTTCAGCACCTGGACGACGCT  
GTGGGCGGTAATGAGTCCAGTCCGGAGGTGGGCTCATCGCAGATCAGAAGCGGCGGAT  
CGGTTAGTGCCTCGGAGGCGAATGCCAGACGCTTCTTTCTCCGCCGGACAGACCTTTCA  
CCCTGCCGGGCACACCGATGATCGTGTGCTGACATTTGCTGAGCGAAAGCTCCTGGATCA  
CCTGATCCACGCGGGCCACTCGCTGCCGATAGGTCAGATGTCGTGGCATCCGCACCATG  
GCCTGGAAAATCAGGTGTTCCCTGGCCGTTAGGGAGCCGATAAAGAGGTCATCCTGCTGG  
ACATAGGCGCACCTGGCCTGCATCTCCTTGGCGTCCACAGGTTGGCCATTGAGCAGTCGC  
ATCCCGGATGGCGATACTTGGATGCCCTGCGGCGATCGAAAGGCAAGGGCATTACAGCAG  
GGTCGTCTTTCCGGCACCGGAACTGCCCATCACGGCCAAAAGTTCGCCCGGATAGGCCAC  
GCCGCAAAGTGAATTTCAAATTGGTAATTGGACCCTTTATTAAGATTTACACACAGATCAGCC  
GACTGCGAATAGAACTCACCGTTCTTGAGCAAATGTTTCTGGGCGCCGGTATGTGTCCG  
TCGTTGCAGAATAGTCCGCGTGTCCGTTGACCAGCTGCCGCCATCCGGAGCCCGGCTG  
ATTGACCGCCCCAAGATGTCCATATTGTGCCAGGCATAGGTGAGGTTCTCGGCTAGTTG  
GCCGCTCCCTGAACCGGAGTCTCCGGCGGACTGGGTGGCCGGAGCGTGCCGTAGTTTT  
TGGCCTGCCCGAAGCCCTGGTTAATGCAGCTCTGCGAAGCCGCTCCGCTGTCACCCTGCA  
ATGATAGGGGATCTCAAATATCAACTACAAGCGTTATGCTCATCTAACCCCGAACAAAAGT  
ACCCCGAAGTATCCTACGAAGTAGGTTTATACTTTTATTTATTTTTGTGCATCTAGGATCAG  
CTTAAATATCTGGTTGTTATTTTTTGTAAAAAGAATATAGTCGAAAATGAATGCCTTTA  
GATGTCTTGATCATGATATGATCTCAAAAATTGTCTTATATAGCGAGAACAGCTACCAGAAT

AATCTGTTTCGTGTCACACTATTTGTTTGTGCAATTGCGGTTTGGGATTTTTGTGGGTTCGCAGT  
TCTCACGCCGCAGACAATTTGATGTTGCAATCGCAGTTCCTATAGATCAAGTGAACCTAAGA  
TGTATGCACATGTACTACTCACATTGTTTCAAGATGCTCGGCAGATGGGTGTTTGTGCCTCC  
GCGAATTAATAGCTCCTGATCCTCTTGGCCCATGCGGGATTTTTCACACTTCCCTGCT  
TACCCACCCAAAACCAATCACACCCCAATCACTCAAAAAACAACAATAAGAAGCGA  
GAGGAGTTTTGGCACAGCACTTTGTGTTTAATTGATGGCGTAAACCGCTTGGAGCTTCGTC  
ACGAAACCGCTGACAAAATGCAACTGAAGGCGGACATTGACGCTACGTAACGCTACAAAC  
GGTGGCGAAAGAGATAGCGGACGCAGCGGCGAAAGAGACGGCGATATTTCTGTGGACAG  
AGAAGGAGGCAAACAGCGCTGACTTTGAGTGGAATGTCATTTTGTGAGTGAGAGGTAATCGAA  
AGAACCTGGTACATCAAATACCCTTGGATCGAAGTAAATTTAAACTGATCAGATAAGTTCA  
ATGATATCCAGTGCAGTAAAAAAAAAAAAATGTTTTTTTATCTACTTTCCGCAAAAATGGGTT  
TTATTAACCTTACATACTAGGGGCCCGGTACGTACCCAATTCGCCCTATAGTGAGTCG  
TATTACAATTCAGTGGCCGTCGTTTTACAACGTCGTGACTGGGAAAACCTGGCGTTACCC  
AACTTAATCGCCTTGCAGCACATCCCCCTTTCGCCAGCTGGCGTAATAGCGAAGAGGCC  
GCACCGATCGCCCTTCCCAACAGTTGCGCAGCCTGAATGGCGAATGGAAATTGTAAGCGT  
TAATATTTTGTAAATTCGCGTTAAATTTTTGTTAAATCAGCTCATTTTTTAACCAATAGGCC  
GAAATCGGCAAAATCCCTTATAAATCAAAGAATAGACCGAGATAGGGTTGAGTGTTGTT  
CAGTTTGAACAAGAGTCCACTATTAAGAAGCTGGACTCCAACGTCAAAGGGCGAAAAAC  
CGTCTATCAGGGCGATGGCCCACTACGTGAACCATCACCTAATCAAGTTTTTTGGGGTTCG  
AGGTGCCGTAAAGCACTAAATCGGAACCCTAAAGGGAGCCCCCGATTTAGAGCTTGACGG  
GGAAAGCCGGCGAACGTGGCGAGAAAGGAAGGGAAGAAAGCGAAAGGAGCGGGCGCTA  
GGGCGCTGGCAAGTGTAGCGGTCACGCTGCGCGTAACCACACACCCGCCGCGCTTAAT  
GCGCCGCTACAGGGCGCGTCAG
