# Supplementary material for: The Drosophila mitotic spindle orientation machinery requires activation, not just localization
Source: PubMed Central journal article supplement — EMBO Rep. 2023 Jan 11;24(3):e56074. doi: 10.15252/embr.202256074 (PMC9986814; doi:10.15252/embr.202256074), 2023-01-11
Supplement: EMBR-24-e56074-s006.pdf [file EMBR-24-e56074-s006.pdf]

# The *Drosophila* mitotic spindle orientation machinery requires activation, not just localization

Kathryn E Neville<sup>1,†</sup>, Tara M Finegan<sup>1,†</sup> , Nicholas Lowe<sup>1</sup> , Philip M Bellomio<sup>1</sup>, Daxiang Na<sup>1</sup> & Dan T Bergstralh<sup>1,2,3,\*</sup> 

## Abstract

The orientation of the mitotic spindle at metaphase determines the placement of the daughter cells. Spindle orientation in animals typically relies on an evolutionarily conserved biological machine comprised of at least four proteins – called Pins, G $\alpha$ i, Mud, and Dynein in flies – that exerts a pulling force on astral microtubules and reels the spindle into alignment. The canonical model for spindle orientation holds that the direction of pulling is determined by asymmetric placement of this machinery at the cell cortex. In most cell types, this placement is thought to be mediated by Pins, and a substantial body of literature is therefore devoted to identifying polarized cues that govern localized cortical enrichment of Pins. In this study we revisit the canonical model and find that it is incomplete. Spindle orientation in the *Drosophila* follicular epithelium and embryonic ectoderm requires not only Pins localization but also direct interaction between Pins and the multifunctional protein Discs large. This requirement can be over-ridden by interaction with another Pins interacting protein, Inscuteable.

**Keywords** discs large; *Drosophila*; pins; spindle orientation

**Subject Categories** Cell Adhesion, Polarity & Cytoskeleton; Cell Cycle

**DOI** 10.15252/embr.202256074 | Received 1 September 2022 | Revised 12 December 2022 | Accepted 22 December 2022 | Published online 11 January 2023

**EMBO Reports (2023) 24: e56074**

## Introduction

The orientation of cell division is implicated in cell fate, as in the asymmetric division of neural progenitor cells, and in tissue architecture, as in the expansion of the *Drosophila* imaginal wing disc (reviewed in Bergstralh *et al.*, 2017). Division orientation is generally determined by the orientation of the mitotic spindle at metaphase. Spindle orientation is governed by a suite of evolutionarily conserved factors comprised of Partner of Inscuteable (Pins; vertebrate LGN; nematode GPR1/2), G $\alpha$ i, Mushroom body defective (Mud; vertebrate NuMA, nematode LIN-5), and Dynein.

A combination of genetic experiments and biochemical work has led to a generalized model in which G $\alpha$ i acts as a membrane anchor for Pins, which in turn recruits Mud to the cortex. Direct binding between Pins/LGN and Mud/NuMA is mediated by tetrapeptide repeats (TPRs) at the N-terminus of Pins/LGN (Du *et al.*, 2001; Siller *et al.*, 2006). Mud and Dynein together exert a pulling force on astral microtubules that reels the spindle into alignment. This model predicts that the key determinant of division orientation should be the placement of the pulling machinery at the cortex.

In most cell types, Pins/LGN is suggested to regulate the cortical position of the pulling machinery. For that reason, multiple studies have focused on the identification and characterization of cues that regulate Pins/LGN/GPR1/2 localization (reviewed in Bergstralh *et al.*, 2017). In *Drosophila* neuroblasts, which are asymmetrically dividing neural progenitor cells, this cue is thought to be a protein called Inscuteable (Kraut *et al.*, 1996; Schaefer *et al.*, 2000; Yu *et al.*, 2000). In symmetrically dividing epithelial cells, proposed Pins/LGN-positioning cues include the junctional proteins E-Cadherin and Afadin (in mammalian culture cells) and the multifunctional scaffolding protein Discs large (in flies, cultured mammalian cells, and chick neuroepithelium; Bergstralh *et al.*, 2013b; Saadaoui *et al.*, 2014; Carminati *et al.*, 2016; Chanet *et al.*, 2017; Glerich *et al.*, 2017). All of these proteins are reported to interact with Pins directly. The proliferation of potential Pins-positioning proteins, particularly in epithelial cells, presents a problem: why are multiple factors necessary, especially in the same cell type?

The function of Pins is also somewhat enigmatic. Essentially, the model holds that it is an adaptor for an adaptor, linking Mud and therefore dynein to the cortex. The inclusion of a Pins-positioning factor like Discs large (Dlg) adds another adaptor to the mechanism. Again, there is a parsimony problem; why are so many adaptors necessary? This question is highlighted by literature showing that the number can be reduced: (i) During anaphase, NuMA anchors itself to the membrane through a cryptic motif that is uncovered by CDK1 phosphorylation (Kiyomitsu & Cheeseman, 2013; Kotak *et al.*, 2013; Seldin *et al.*, 2013; Zheng *et al.*, 2014); and (ii) the planar cell polarity protein Disheveled can act as an alternative cortical anchor for Mud (Segalen *et al.*, 2010).

1 Department of Biology, University of Rochester, Rochester, New York, USA

2 Department of Physics & Astronomy, University of Rochester, Rochester, New York, USA

3 Department of Biomedical Genetics, University of Rochester Medical Center, Rochester, New York, USA

\*Corresponding author. Tel: +1 585 275 2631; E-mail: dan.bergstralh@rochester.edu

<sup>†</sup>These authors contributed equally to this work as first authors

These questions led us to revisit the canonical model and test its predictions, starting from the most fundamental. We find that the model is incomplete. Spindle orientation relies not only on the position of Pins but also on interaction with factors that promote its activity.

## Results

### Cortical mud localization relies on pins

Mitotic spindles in epithelial cells tend to orient along the plane of the tissue, meaning perpendicular to the apical-basal axis. In this way, divisions are oriented such that the two new daughter cells appear within the tissue (reviewed in Bergstrahl *et al*, 2013a). The pulling machinery should therefore be expected to work at or adjacent to epithelial cell–cell borders (*i.e.* at the lateral cortex), and in agreement we have already shown that both Mud and Pins are lateral in mitotic follicle cells (Bergstrahl *et al*, 2013b).

The canonical model holds that Pins acts as a cortical recruitment factor for Mud during mitosis (reviewed in Siller & Doe, 2009; Morin & Bellaïche, 2011; Werts & Goldstein, 2011; di Pietro *et al*, 2016; Bergstrahl *et al*, 2017). Whether this holds true in *Drosophila* epithelia has not been tested outside of the pupal notum and larval wing disc, developmentally related tissues in which Mud localizes to tricellular junctions in a Pins-independent manner (David *et al*, 2005; Bergstrahl *et al*, 2016; Bosveld *et al*, 2016; Nakajima *et al*, 2019). We tested it in the *Drosophila* follicular epithelium (FE) and show here that cortical localization of Mud in mitotic follicle cells relies on Pins, whereas Mud localization at spindle poles is Pins-independent (Fig 1A). This pattern was previously observed in mitotic neuroblasts (Siller *et al*, 2006). Unexpectedly, Mud is also cortical in interphase follicle cells, and this localization relies on Pins (Fig 1B). Pins therefore has a general, rather than mitosis-specific, role in Mud localization in the follicular epithelium.

The Pins-binding domain (PBD) of Mud was previously mapped to a location between amino acids 1,928 and 1,982 (Izumi *et al*, 2006; Siller *et al*, 2006). We tested the importance of this region to spindle orientation in the FE using transgenes that encode the genomic promoter of Mud followed by either GFP-tagged full length Mud or Mud lacking the PBD (Bosveld *et al*, 2016). We expressed these transgenes in *mud<sup>3</sup>/mud<sup>4</sup>* flies, in which endogenous Mud function is strongly impaired (Yu *et al*, 2006). In this background, full length GFP-Mud is observed at the cortex and at spindle poles and spindle orientation is rescued from random to the wild type distribution (Fig 1C–E). Contrastingly, GFP-Mud $\Delta$ PBD is observed at spindle poles but not the cortex, and fails to rescue spindle orientation (Fig 1C–E). One caveat to interpretation is that the PBD overlaps with a region of Mud that can bind microtubules (AA1,850–2,039), meaning that cortical localization may not be the only impairment caused by the deletion (Izumi *et al*, 2006; Siller *et al*, 2006). However, taken together our results are consistent with the canonical model, in the follicle epithelium Pins is required for the cortical localization and the spindle orientation function of Mud. A corollary to this finding is that the FE is a suitable system in which to interrogate the model.

### Pins may act as a cortical anchor for mud, but this function is not obligate

We next characterized the subcellular localization of Pins in the FE. We generated transgenic flies expressing Pins:Tomato (Pins:Tom) under the control of the Pins genomic promoter. Pins:Tom is observed in all cell types in the egg chamber during the developmental stages at which follicle cells divide (prior to developmental Stage 7), and unlike Mud it can be detected past that point (Fig 2A). Pins:Tom overlaps with cortical actin; both are observed at the border between the FE and the interior germline cells and are more weakly detected at follicle cell–cell borders (Fig 2A). Unlike actin, however, Pins:Tom is not obvious at the basal cell surface (Fig 2B). We considered the possibility that Pins signal at the follicle cell–germline border is contributed by the germline cells, but clonal expression of Ubi-Pins-YFP shows that Pins localizes to the apical surface of follicle cells and accounts for the great majority of the signal at the border (Fig EV1A). In addition, although UAS-Pins-GFP is difficult to detect (a problem encountered by previous researchers) it is apically enriched when expressed in the FE but not the germline (Fig EV1B) (Chanet *et al*, 2017). Together these results agree with previous work showing that the vertebrate ortholog of Pins (LGN) is apical in interphase epithelial cells, though we can also find Pins along lateral surfaces (Hao *et al*, 2010).

The canonical model describes Pins as a recruitment factor for Mud, suggesting that the two proteins should localize together at the cortex. During interphase, GFP:Mud shows a similar pattern to Pins:Tom, though the signal is not strong enough to confirm colocalization (Fig 2A). Consistent with our prior work, we find that both proteins appear along the basolateral cortex in mitotic cells, with an enrichment just below the apical surface (we term this position “mediolateral”) and a decrease toward the basal surface (Fig 2B and C; Bergstrahl *et al*, 2013b). However, unlike Mud, Pins:Tom can also be distinguished at the apical cell surface (Fig 2C and D). Clonal expression of Ubi-Pins-YFP confirms that this signal originates primarily in the mitotic cell rather than the adjacent germline cell (Fig EV1C). Actin shows a similar pattern to Pins:Tom, but stronger enrichment at the apical surface (Fig 2C and D). A likely explanation is that this is at least in part because of cortical actin in the adjacent germline cell.

Together, these results show that in the follicular epithelium, the locations of Pins and Mud do not always correspond. This has also been shown in the wing disc and pupal notum, in which Pins is cortically localized but does not control the location of Mud (David *et al*, 2005; Bergstrahl *et al*, 2016; Bosveld *et al*, 2016). Our findings do not contradict a role for Pins in cortical anchoring of Mud. However, they suggest that this function is not obligate even in cells in which Mud relies on Pins for its cortical location.

### Relocalization of pins at mitosis does not require a pins-specific cue

We next addressed the question of how Pins relocates from the apical to the lateral cortex at mitosis. Previous work, including our own, has suggested that this an active change mediated by a cortical polarity cue (Hao *et al*, 2010; Bergstrahl *et al*, 2013b). Another model to consider is that Pins relocalization occurs passively. During mitosis, the composition and material properties of the actin

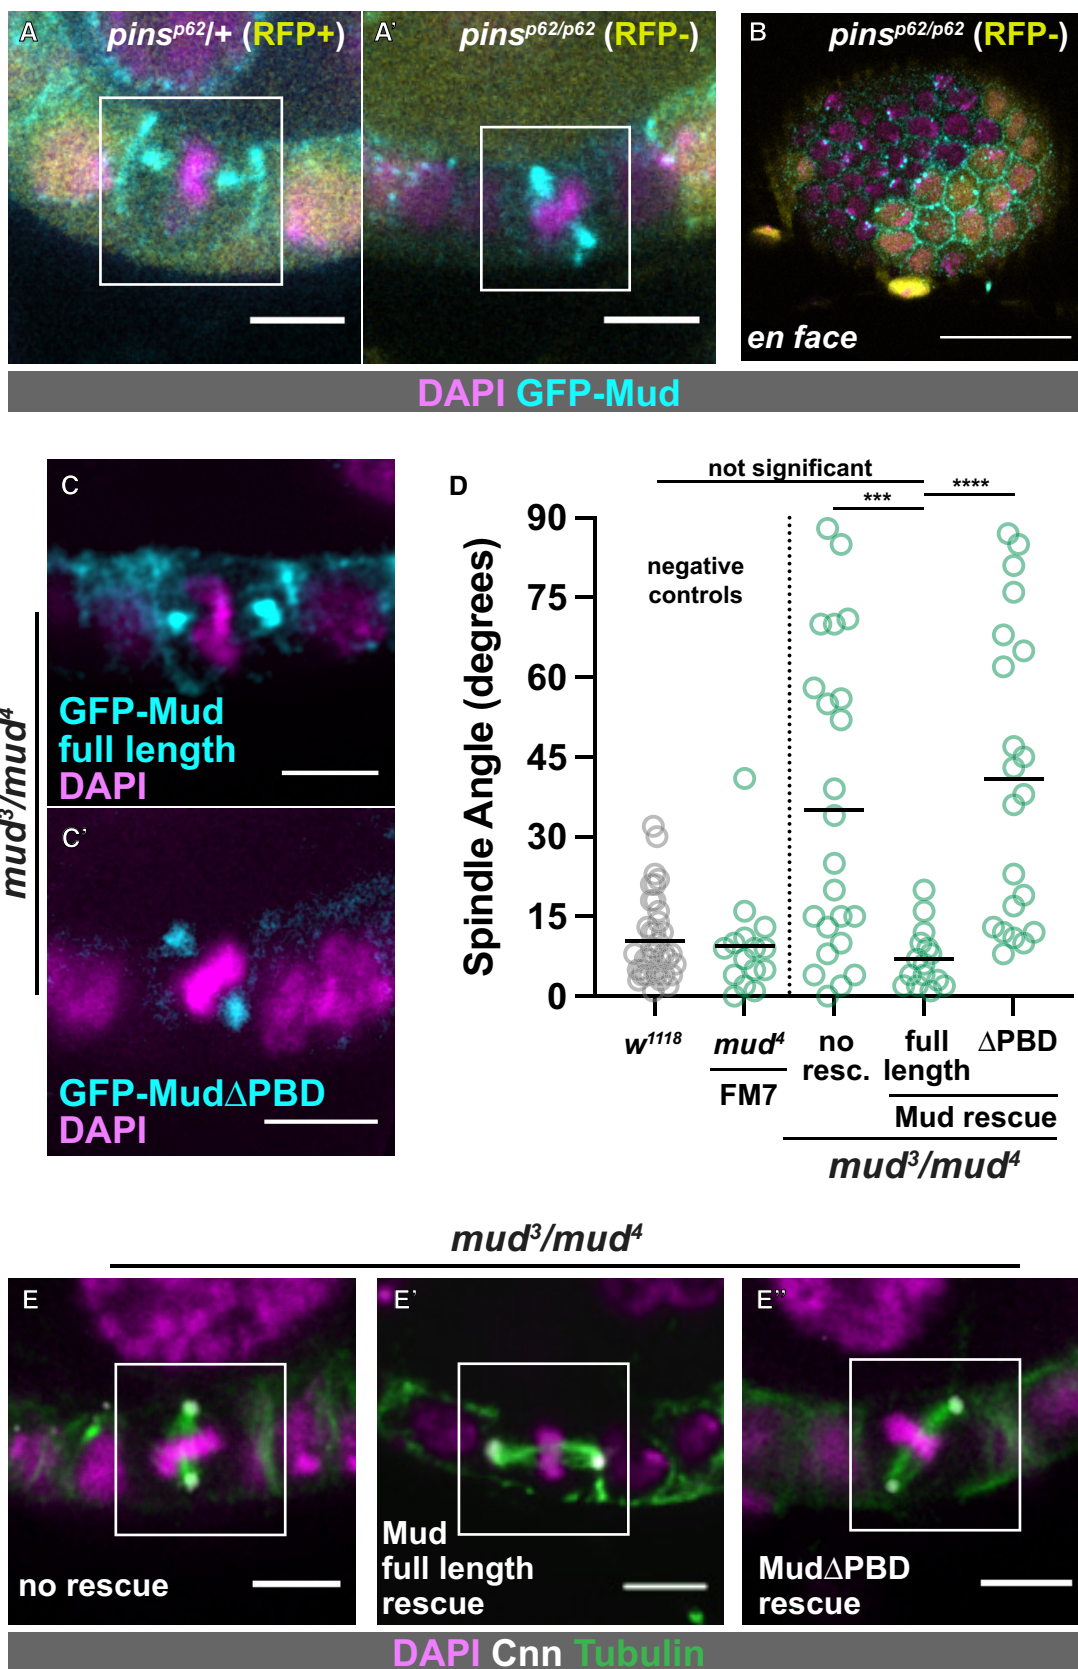

Figure 1.

**Figure 1. The cortical localization and spindle orienting function of Mud both rely on Pins.**

- A GFP:Mud is observed at spindle poles and at the lateral cell cortex in control mitotic follicle cells (A), but is only seen at the spindle poles in *pins<sup>62</sup>/pins<sup>62</sup>* cells (A). Scale bars = 5 microns.
- B Interphase localization of Mud at the cortex is lost in *pins<sup>62</sup>/pins<sup>62</sup>* follicle cells. Scale bar = 20 microns.
- C–E Full-length GFP:Mud shows the wild-type pattern of localization in *mud<sup>3</sup>/mud<sup>4</sup>* mitotic follicle cells (C) and rescues spindle orientation (D, E). Scale bars = 5 microns. GFP:Mud lacking the Pins binding domain localizes only at spindle poles (C') in *mud<sup>3</sup>/mud<sup>4</sup>* mitotic follicle cells and fails to rescue spindle orientation (D, E). Statistical significance in spindle orientation was determined using the Mann–Whitney test. \*\*\*\**P* < 0.0001, \*\*\**P* < 0.001.

cortex undergo changes associated with cell rounding (Chugh & Paluch, 2018). The possibility that the change in Pins localization simply reflects these changes is suggested by the following observations: (i) Pins:Tom overlaps closely with actin throughout the cell cycle (Figs 2B and EV2A); (ii) both proteins are enriched at the mitotic cortex (Fig 2B); and (iii) the unrelated transmembrane protein Basigin, a marker for follicle cell boundaries, is also cortically enriched at mitosis (Figs 2B and EV2B) (Bergstralh et al, 2015).

We used UAS-Pins-myr-GFP, a myristoylated Pins variant developed by the Martin lab, to test between the active and passive models for Pins relocation at mitosis (Chanet et al, 2017). We expressed Pins.myr-GFP in the FE and examined its localization and impact on spindle orientation. The active model predicts that the myristoyl modification might circumvent mechanisms that control asymmetric localization of Pins at the cortex, and that Pins-myr should therefore localize broadly around the plasma membrane. It does not. During interphase, Pins-myr is observed at the apical surface and lateral borders, though unlike Pins:Tom, Pins-myr signal extends evenly along the length of the epithelial cell–cell border rather than concentrating towards the apical side (Fig EV2A and C). During mitosis Pins-myr is enriched at the lateral cell–cell border and more weakly observed at the apical surface, a pattern very similar if not identical to Pins:Tom (Fig 3A and C). Myristoylated-RFP, a negative control, demonstrates similar localization to Pins:Tom and Pins-myr (Figs 3B and C, and EV2D). These results are consistent with the passive model. We also find that Pins-myr expression rescues spindle orientation in *pins* null tissue, indicating that it is able to substitute for wild-type Pins (Fig 3D–F). Together, our results indicate that the apparent relocation of Pins from the apical to the lateral surface at mitosis—from which position it drives spindle orientation—can largely be explained as the placement of a membrane-anchored protein.

**Pins is cortical in the absence of Dlg**

The finding that membrane anchoring is sufficient to explain Pins localization at mitosis presents a challenge to our previous work, in which we suggested that relocation relies on the epithelial polarity factor Discs large (Bergstralh et al, 2013b). Subsequent studies in the early *Drosophila* embryo, chick neuroepithelium, and unpolarized cultured cells indicated that Dlg is not just a cue but an anchor

for Pins at the cell boundary (Saadaoui et al, 2014; Chanet et al, 2017). However, Pins/LGN is thought to be linked to the membrane by Gai-GDP, raising the question of why a second anchor would be required (reviewed in Siller & Doe, 2009; Morin & Bellaïche, 2011; Werts & Goldstein, 2011; Bergstralh et al, 2017). We therefore revisited the question of how Dlg participates in spindle orientation.

The spindle-orienting function of Dlg is thought to be mediated by direct interaction between the inactive C-terminal Guanylate Kinase (GUK) domain of Dlg and an evolutionarily conserved Pins phosphoserine (*Drosophila* S436, human S408; Johnston et al, 2009; Hao et al, 2010; Zhu et al, 2011; Saadaoui et al, 2014). We confirmed this in the follicle epithelium in two ways: Firstly, we tested the role of Dlg. The *Dlg<sup>1P20</sup>* allele encodes a truncated protein that is missing approximately one-third of its GUK domain and cannot bind to Pins *in vitro* (Bergstralh et al, 2016). We showed previously that spindles are misoriented in *Dlg<sup>1P20</sup>* FE tissue, though apico-basal polarity is maintained (Bergstralh et al, 2013b). That analysis was performed using mitotic clones, raising the possibility that the spindle orientation defect could be caused by a second mutation on the *Dlg<sup>1P20</sup>* chromosome. We tested this possibility using flies heterozygous for *Dlg<sup>1P20</sup>* and *Dlg<sup>2</sup>*, a strong temperature-sensitive hypomorphic allele. We find that follicle cell spindles in *Dlg<sup>1P20/2</sup>* egg chambers are misoriented at restrictive temperature (29°C; Fig 4A). These results confirm that disruption of the Dlg C-terminus causes spindle misorientation. Secondly, we examined the consequence of Pins phosphorylation. We generated transgenic flies encoding Pins, Pins-S436D (phosphomimetic), or Pins-S436A (unphosphorylatable) under UAS control and expressed these variants in *pins* null clones. We find that Pins and Pins-S436D both rescue spindle orientation, while Pins-S436A does not, in agreement with previous work (Fig 4B and C) (Johnston et al, 2009; Hao et al, 2010). These results are consistent with a model in which Dlg participates in spindle orientation through interaction with phosphorylated Pins.

We next asked whether Dlg controlled Pins localization during mitosis. We showed previously that cortical recruitment of Pins in the FE is Dlg-independent, but a difficulty for interpretation is that these results relied on Pins-YFP, which is driven by a Ubiquitin promoter and therefore likely to be overexpressed (David et al, 2005; Bergstralh et al, 2013b). We repeated the experiment using Pins:

**Figure 2. Expression and localization of Pins:Tom and GFP:Mud in interphase and mitotic follicle cells.**

- A Pins:Tom and GFP:Mud both appear enriched at the apical surface of follicle cells, and can be weakly detected at lateral surfaces. Enrichment of Mud at the oocyte nucleus has been reported previously (Zhao et al, 2012). Unlike GFP:Mud, Pins:Tom can be seen past Stage 6, the developmental point at which follicle cell division ceases. The red arrow points to a later (~ Stage 8) egg chamber. Scale bars = 20 microns.
- B Pins and actin overlap extensively, though actin is observed at the basal surface (red arrow in B) whereas Pins is not (red arrow in B'). Scale bars = 5 microns.
- C, D Pins:Tom and GFP:Mud have overlapping but not identical localization patterns in mitotic follicle cells. Representative pictures (C) and quantification from 9 cells (D) are shown. Scale bars = 5 microns.



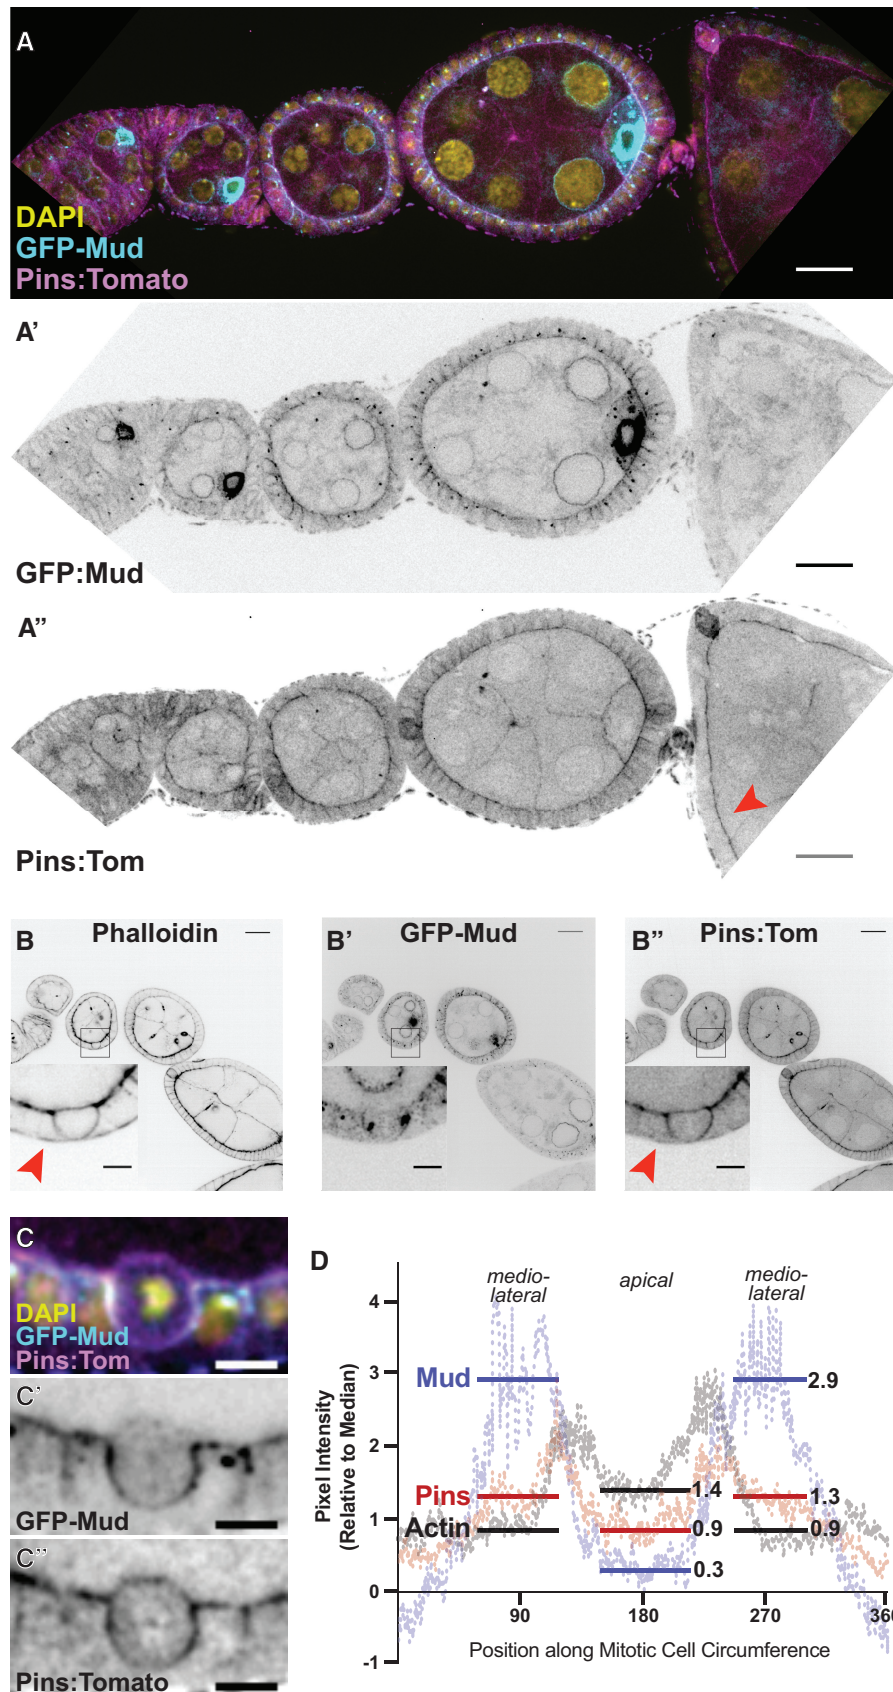

Figure 2.

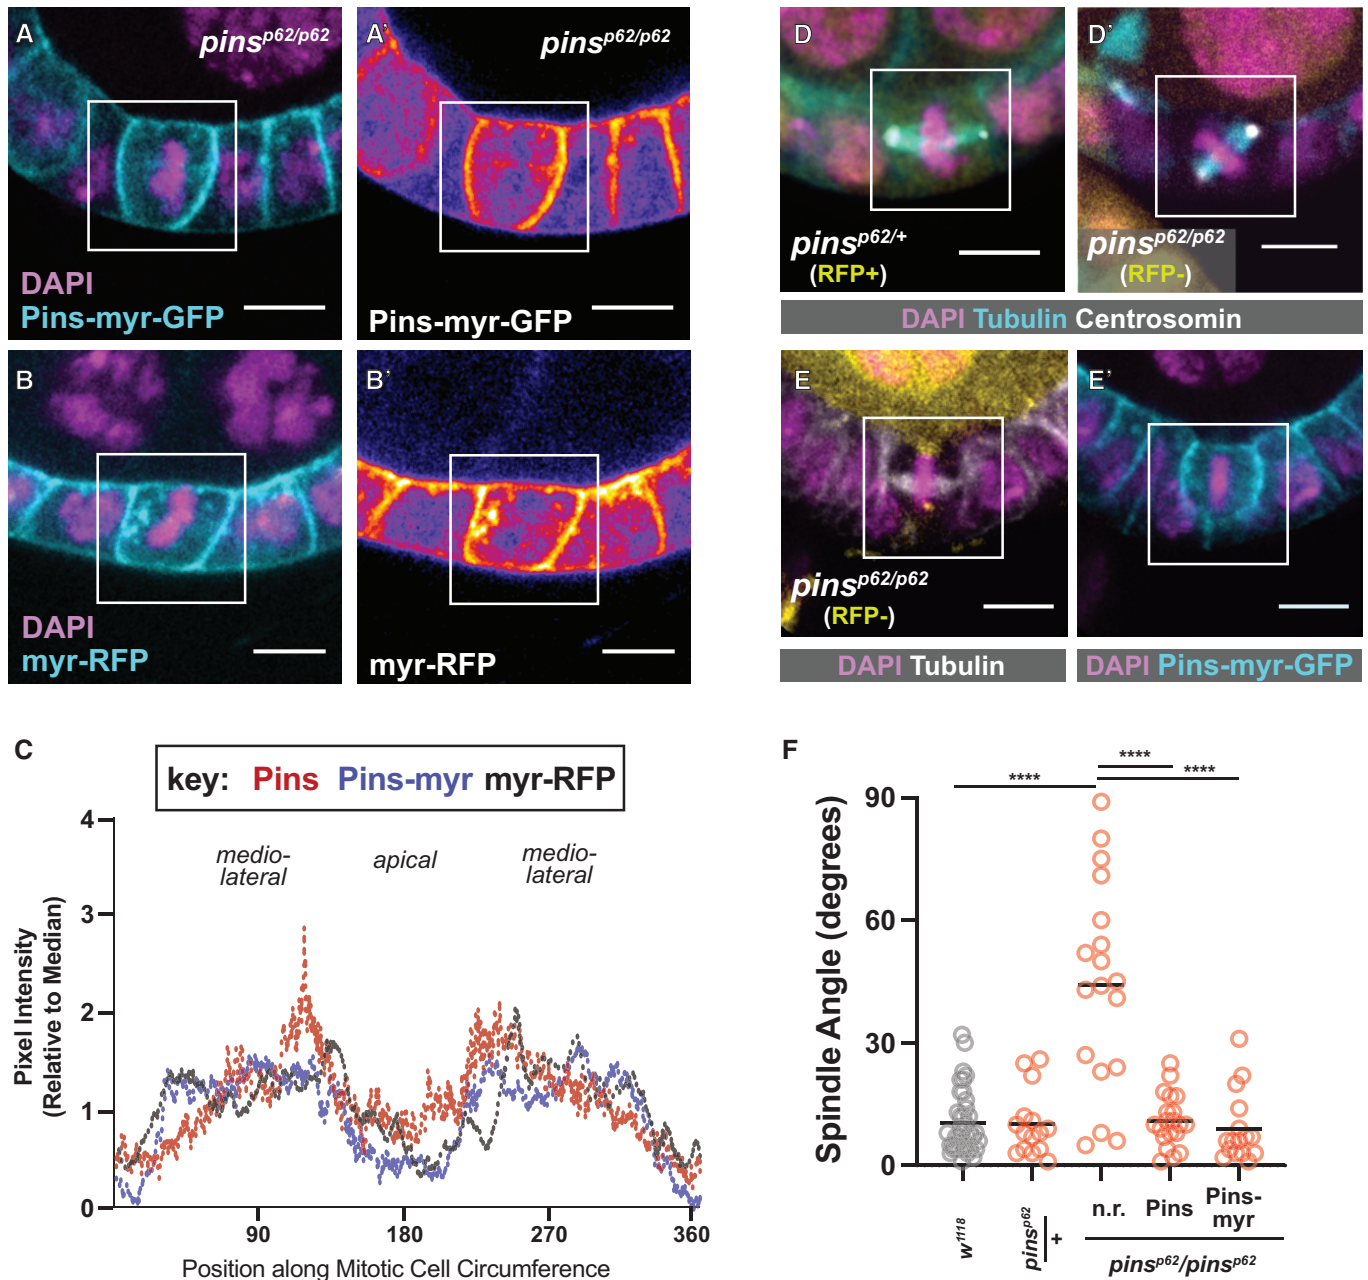

**Figure 3. Pins does not require a Pins-specific cue to relocalize at mitosis.**

A–C Pins-myR-GFP and myR-RFP show a similar localization pattern to Pins:Tom during mitosis. Representative pictures are shown (A, B); a heatmap lookup table (A', B') emphasizes the relative enrichments of Pins-myR-GFP and myR-RFP along the cortex. Quantification (Pins-myR: 4 cells, myR-RFP: 2 cells) (C).

D–F Random spindle orientation in *pins*<sup>p62/pins</sup><sup>p62</sup> null mutant follicle cells is rescued by the expression of full-length Pins or Pins-myR-GFP. Representative pictures (D, E) and quantification (F) are shown. Scale bars = 5 microns. Statistical significance in spindle orientation was determined using the Mann–Whitney test. \*\*\*\**p* < 0.0001.

Tom. We found that (i) Pins:Tom localizes to the mitotic cell cortex in *Dlg*<sup>14</sup>/*Dlg*<sup>14</sup> mutant follicle cells, which are Dlg protein null, and in *Dlg*<sup>1P20</sup>/*Dlg*<sup>1P20</sup> cells (Fig EV3A and B) and that (ii) GFP-Mud and Pins:Tom localize to the mitotic cortex in *Dlg*<sup>1P20</sup>/*Dlg*<sup>2</sup> mutant follicle cells (Fig 4D and E). Additionally, Pins, Pins-S436D, and Pins-S436A are all observed at the mitotic cortex in *pins* null clones (Fig 4F). These results indicate that the spindle orienting function of

Dlg is not through cortical anchoring of Pins. To test this even further, we expressed Pins-myR in *Dlg*<sup>1P20</sup>/*Dlg*<sup>2</sup> mutant follicle cells. While the localization of this variant is identical to Pins-myR in a control background, it fails to rescue spindle orientation (Fig 4C, E and G). Together, our findings indicate that while Dlg is important for spindle orientation in the FE, the effect is not through redistribution of Pins.

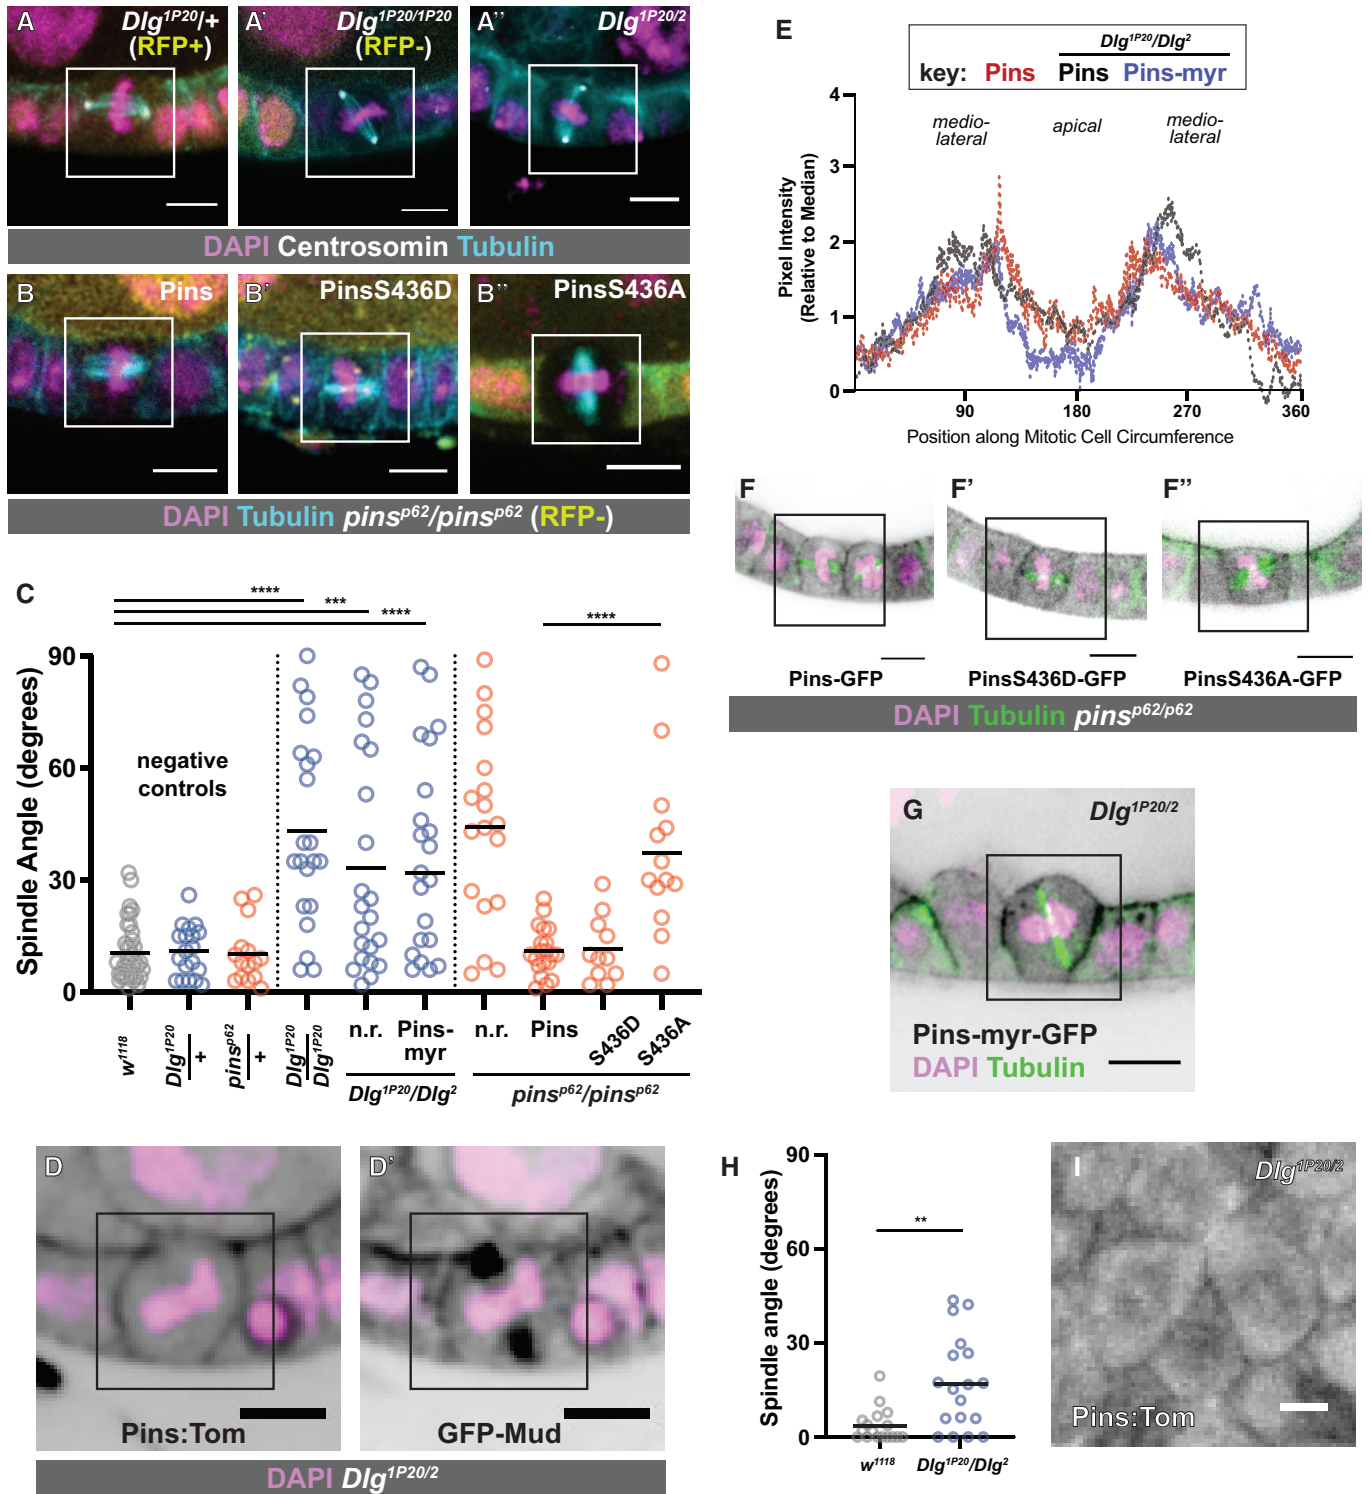

Figure 4.

We also examined the relationship between Pins and Dlg in a different epithelium, the ventral ectoderm of the early (Stage 10) *Drosophila* embryo. Consistent with our findings in the FE, mitotic spindles in this tissue are misoriented with respect to the apical-basal plane in embryos from *Dlg*<sup>1P20</sup>/*Dlg*<sup>2</sup> mothers (Fig 4H). As in

the FE, Pins:Tom is observed at mitotic cell cortices, indicating that Pins localization in this tissue does not require direct interaction with Dlg (Fig 4I). These results contrast with the finding that cortical localization of Pins in embryonic head epithelial cells is lost when *Dlg* mRNA is knocked down (Chanet et al, 2017). We therefore



#### Figure 4. Dlg and Pins interact to promote spindle orientation in the follicle epithelium, but Dlg is not required for cortical localization of Pins.

- A Spindle orientation is randomized in  $Dlg^{1P20}/Dlg^{1P20}$  and  $Dlg^{1P20}/Dlg^2$  mutant follicle cells.
- B Random spindle orientation in  $pins^{p62}/pins^{p62}$  null mutant follicle cells is rescued by the expression of full-length Pins or phosphomimetic (S436D) Pins. Unphosphorylatable (S436A) Pins fails to rescue.
- C Quantification of spindle orientation phenotypes. Statistical significance in spindle orientation was determined using the Mann–Whitney test. \*\*\*\* $P < 0.0001$ , \*\*\* $P < 0.001$ .
- D Pins:Tom and GFP:Mud are cortical in  $Dlg^{1P20}/Dlg^2$  mutant follicle cells.
- E Pins:Tom and Pins-myr are both laterally enriched at mitosis in  $Dlg^{1P20}/Dlg^2$  mutants. Wild-type Pins:Tom signal quantification data as in Fig 2D (9 cells). Quantification of Pins:Tom in  $Dlg^{1P20}/Dlg^2$  is 5 cells, Pins:Myr in  $Dlg^{1P20}/Dlg^2$  is 8.
- F GFP-tagged Pins variants (control, phosphomimetic, unphosphorylatable) are observed at the mitotic cell cortex in  $pins^{p62}/pins^{p62}$  null mutant follicle cells.
- G Pins-myr-GFP fails to rescue spindle randomization in  $Dlg^{1P20}/Dlg^2$  mutant follicle cells. Quantification in (C).
- H Quantification of spindle orientation phenotypes in the Stage 9/10 embryonic ectoderm.  $n = 17$  cells from 2 embryos in  $w^{1118}$  and  $n = 18$  cells from 2 embryos in  $Dlg^{1P20}/Dlg^2$  embryos. Statistical significance in spindle orientation was determined using the Mann–Whitney test. \*\* $P = 0.0015$ .
- I Pins:Tom is cortical in the early embryonic ventral ectoderm from a  $Dlg^{1P20}/Dlg^2$  mother. Representative image from an embryo imaged live.
- Data information: scale bars = 5 microns.

speculate that Dlg plays an additional role in that tissue, upstream of Pins.

#### Khc-73 is not required for spindle orientation in the follicular epithelium

Another proposed explanation for the role of Dlg in spindle orientation is that it facilitates interaction between Pins and a microtubule-capturing activity. This has been studied in an artificially polarized S2 (cultured) cell system, in which the microtubule-capturing factor is the plus-end directed motor Khc-73 (Siegrist & Doe, 2005; Johnston et al, 2009; Lu & Prehoda, 2013). Khc73 is also part of a Pins/Dlg pathway that rescues division orientation in Inscuteable-mutant neuroblasts (Siegrist & Doe, 2005). Given that epithelial cells express Dlg but not Inscuteable, the possibility that this rescue pathway is the default in epithelia is particularly

attractive. We tested it in follicle cells using (i) flies transheterozygous for the null alleles  $Khc-73^{149}$  and  $Khc-73^{193}$ , (ii) expression of Khc73 shRNA in the follicular epithelium; and (iii) mitotic clones mutant for the null allele  $Khc73^{3-3}$  (Liao et al, 2018; Zajac & Horne-Badovinac, 2022). Spindle angles were normal in all of these conditions (Fig 5A and C).

Dlg is also proposed to link the spindle orienting machinery to another microtubule capturing protein called GUKHolder (GUKH), though loss of GUKH function has a negligible effect on spindle orientation in neuroblasts (Golub et al, 2017). We examined spindle orientation in follicle cells mutant for  $GUKH^{J785}$ , which encodes a premature stop at Q520. (Full length isoforms are > 1700AA.) This allele causes failed projection of photoreceptor axons and lethality (Berger et al, 2008). Spindle orientation was normal in  $GUKH^{J785}$  cells and likewise unaffected by expression of shRNA targeting  $GUKH$  transcript, though we do not have

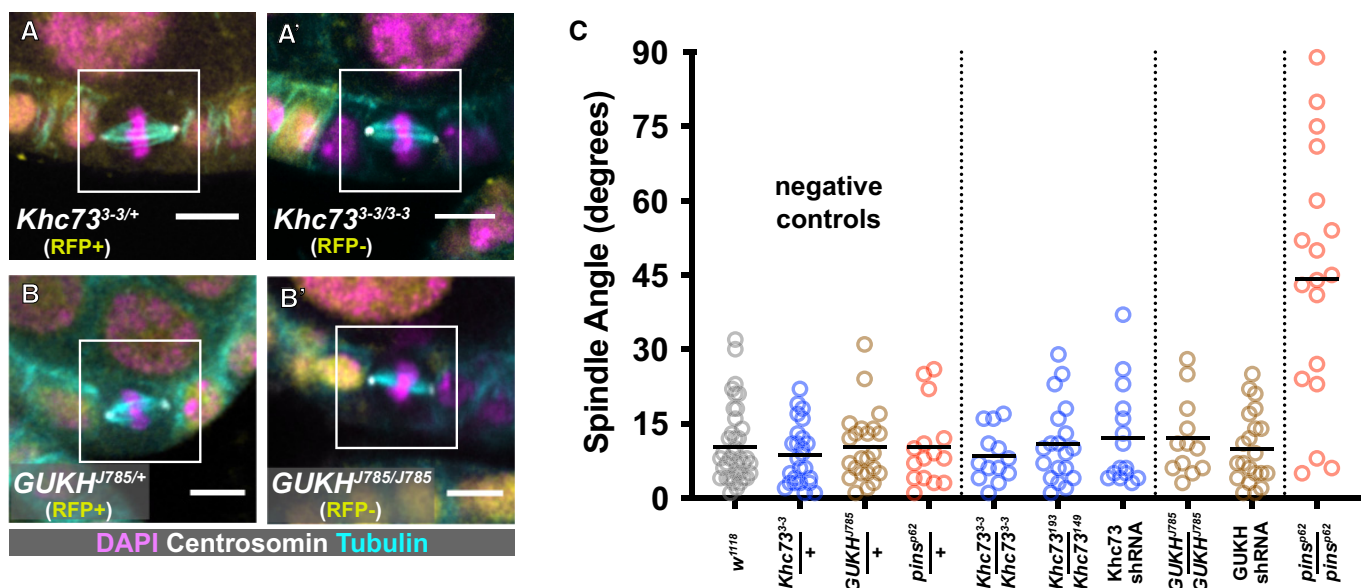

#### Figure 5. Putative microtubule-capturing factors are not required for spindle orientation in the follicular epithelium.

- A–C Multiple genetic approaches were used to test a role for either Khc73 or GUKHolder in metaphase spindle orientation. Representative pictures (A, B) and quantification (C) are shown. Scale bars = 5 microns. Spindle angle randomization in  $pins^{p62}/pins^{p62}$  null mutant follicle cells is included as a positive control for comparison.



direct evidence of knockdown (Fig 5B and C). Together, these findings show that Khc73 is dispensable for spindle orientation in the follicle epithelium and do not support a role for GUKHolder.

### Two patterns of Inscuteable localization predict spindle orientation

Our findings indicate that Discs large promotes Pins-dependent spindle orientation without acting as a localization factor or a link to microtubule-capturing molecules. They also show that, in contradiction to the model, Pins localization is not sufficient to determine the activity of the pulling force. Another way to test this is to move Pins to a different location on the cortex.

A potential strategy for relocating the spindle machinery is ectopic expression of Inscuteable, which is required for apical localization of Pins in neuroblasts (Schaefer et al, 2000; Yu et al, 2000). This manipulation has a well-established impact on the position of the pulling force; ectopic expression of Inscuteable in any of three *Drosophila* epithelia—the embryonic ectoderm, larval neuroepithelium, and follicular epithelium—causes reorientation of mitotic spindles such that they are parallel, rather than perpendicular, to the apical-basal axis (Kraut et al, 1996; Bowman et al, 2006; Egger et al, 2007; Bergstralh et al, 2015). Our own earlier investigation of UAS-Inscuteable expression in the FE was performed using the mosaic GAL4 drivers GR1-GAL4 and T155-GAL4 and relied on visualization of Inscuteable (by immunostaining) at the apical cell cortex to confirm expression (Bergstralh et al, 2015). We repeated the experiment using Traffic jam-GAL4, which is less mosaic across a given egg chamber, though in our hands generally weaker than other drivers. In agreement with our previous work, cells with a strong (~4-fold > median) apical enrichment of Inscuteable (Insc<sup>A</sup>) demonstrate perpendicular spindle orientation (Figs 6A, B and F, and EV4A) (Bergstralh et al, 2015). However, we also identified a population of cells that demonstrates both lateral and apical localization of Inscuteable (Insc<sup>B</sup>) (Fig 6C and D). In an exceptional instance, it is only lateral (Fig EV4B). Spindle orientation is normal in this group (Fig 6F). We considered whether Insc<sup>A</sup> cells resolve to become Insc<sup>B</sup>, but consider this possibility unlikely because we observed misoriented divisions in previous work (Bergstralh et al, 2015).

We speculate that the two populations reflect different expression levels, meaning that there is a threshold of expression over which Inscuteable causes reorientation. Two lines of evidence support this possibility. Firstly, ectopic expression of Inscuteable in the embryonic ectoderm causes a reliable reorientation of spindle angles

rather than a bimodal distribution, consistent with the possibility that the threshold is met in that tissue (Kraut et al, 1996; Bergstralh et al, 2015). Secondly, we found that spindle reorientation was less common when UAS-Inscuteable flies were maintained at 25°C rather than 29°C (Fig 6F and G). The UAS-GAL4 system is more efficient at the higher temperature.

### The spindle-orientation machinery must be activated, not just localized

Although Inscuteable can reorient epithelial cell spindles, a careful examination of the spindle orienting machinery in epithelial cells expressing Inscuteable has not been undertaken. We first tested the influence of Inscuteable on cortical polarity. In neuroblasts, Inscuteable and the Par complex proteins aPKC and Bazooka rely on one another for apical localization (Wodarz et al, 1999, 2000; Schaefer et al, 2000; Yu et al, 2000). In wild type follicle cells aPKC is an apical polarity marker at interphase but loses its polarized enrichment during mitosis (Morais-de-Sá & Sunkel, 2013; Bergstralh et al, 2013b). In agreement with interdependence between Inscuteable and the Par complex, we find that aPKC is stabilized at the apical cortex in Insc<sup>A</sup> cells but enriched at the lateral cortex in Insc<sup>B</sup> cells (Fig 6E). This finding is consistent with an Inscuteable-expression threshold model; below the threshold, Pins dictates lateral localization of Inscuteable and aPKC. Above the threshold, Inscuteable dictates apical localization of Pins and aPKC.

The canonical model predicts that Pins and Mud should be recruited to the apical surface in Insc<sup>A</sup> cells, from which position they would draw the spindle into alignment along the apical-basal axis, and that Pins and Mud should be primarily lateral in Insc<sup>B</sup> cells, where they would promote wild type spindle orientation (perpendicular to the apical-basal axis). These predictions are not met. Instead, we find that Pins is apically enriched in both Insc<sup>A</sup> and Insc<sup>B</sup> cells (Figs 6A–D and EV4D). Mud looks markedly different to Pins. Although a stronger enrichment is observed at the apical surface in Insc<sup>A</sup> cells than in the Insc<sup>B</sup> cells, Mud is most prominent at the mediolateral regions in both Insc<sup>A</sup> and Insc<sup>B</sup> cells (Figs 6A–D and EV4D).

These results conflict with the canonical model. If spindle orientation is predicted only by the location of Pins, Insc<sup>A</sup> and Insc<sup>B</sup> cells should both be expected to orient their spindles along the apical-basal axis, as in neuroblasts. If spindle orientation is predicted only by the location of Mud, Insc<sup>A</sup> and Insc<sup>B</sup> cells should both be expected to orient their spindles along the tissue plane, as in the wild type. Our results show that the strongest

#### Figure 6. Inscuteable and Dlg function as distinct activators of the pulling machinery.

- A–D Two distinct patterns of Inscuteable localization are observed in the follicular epithelium when UAS-Inscuteable is driven by Traffic jam-GAL4. (A, C) In the first pattern (Insc<sup>A</sup>), Inscuteable is highly enriched at the apical cell surface. (B, D) In the second pattern (Insc<sup>B</sup>), Inscuteable is observed at both the lateral and apical cortex. Mud and Pins localizations are also shown. Representative pictures (A, B) and quantifications (Insc<sup>A</sup>: average of 5 cells, Insc<sup>B</sup>: average of 7 cells) (C, D) are shown.
- E aPKC localization in Insc<sup>A</sup> and Insc<sup>B</sup> follicle cells.
- F Quantification of spindle orientation phenotypes shows that mitotic spindles are reoriented in Insc<sup>A</sup> cells, but not Insc<sup>B</sup> cells. Reorientation relies on Mud but not on the interaction between Pins and Dlg.
- G The ratio of Insc<sup>A</sup> to Insc<sup>B</sup> is impacted by temperature and by the interaction between Pins and Dlg. Significance was determined using the chi-square test. \*\**p* < 0.01.

Data information: scale bars = 5 microns.

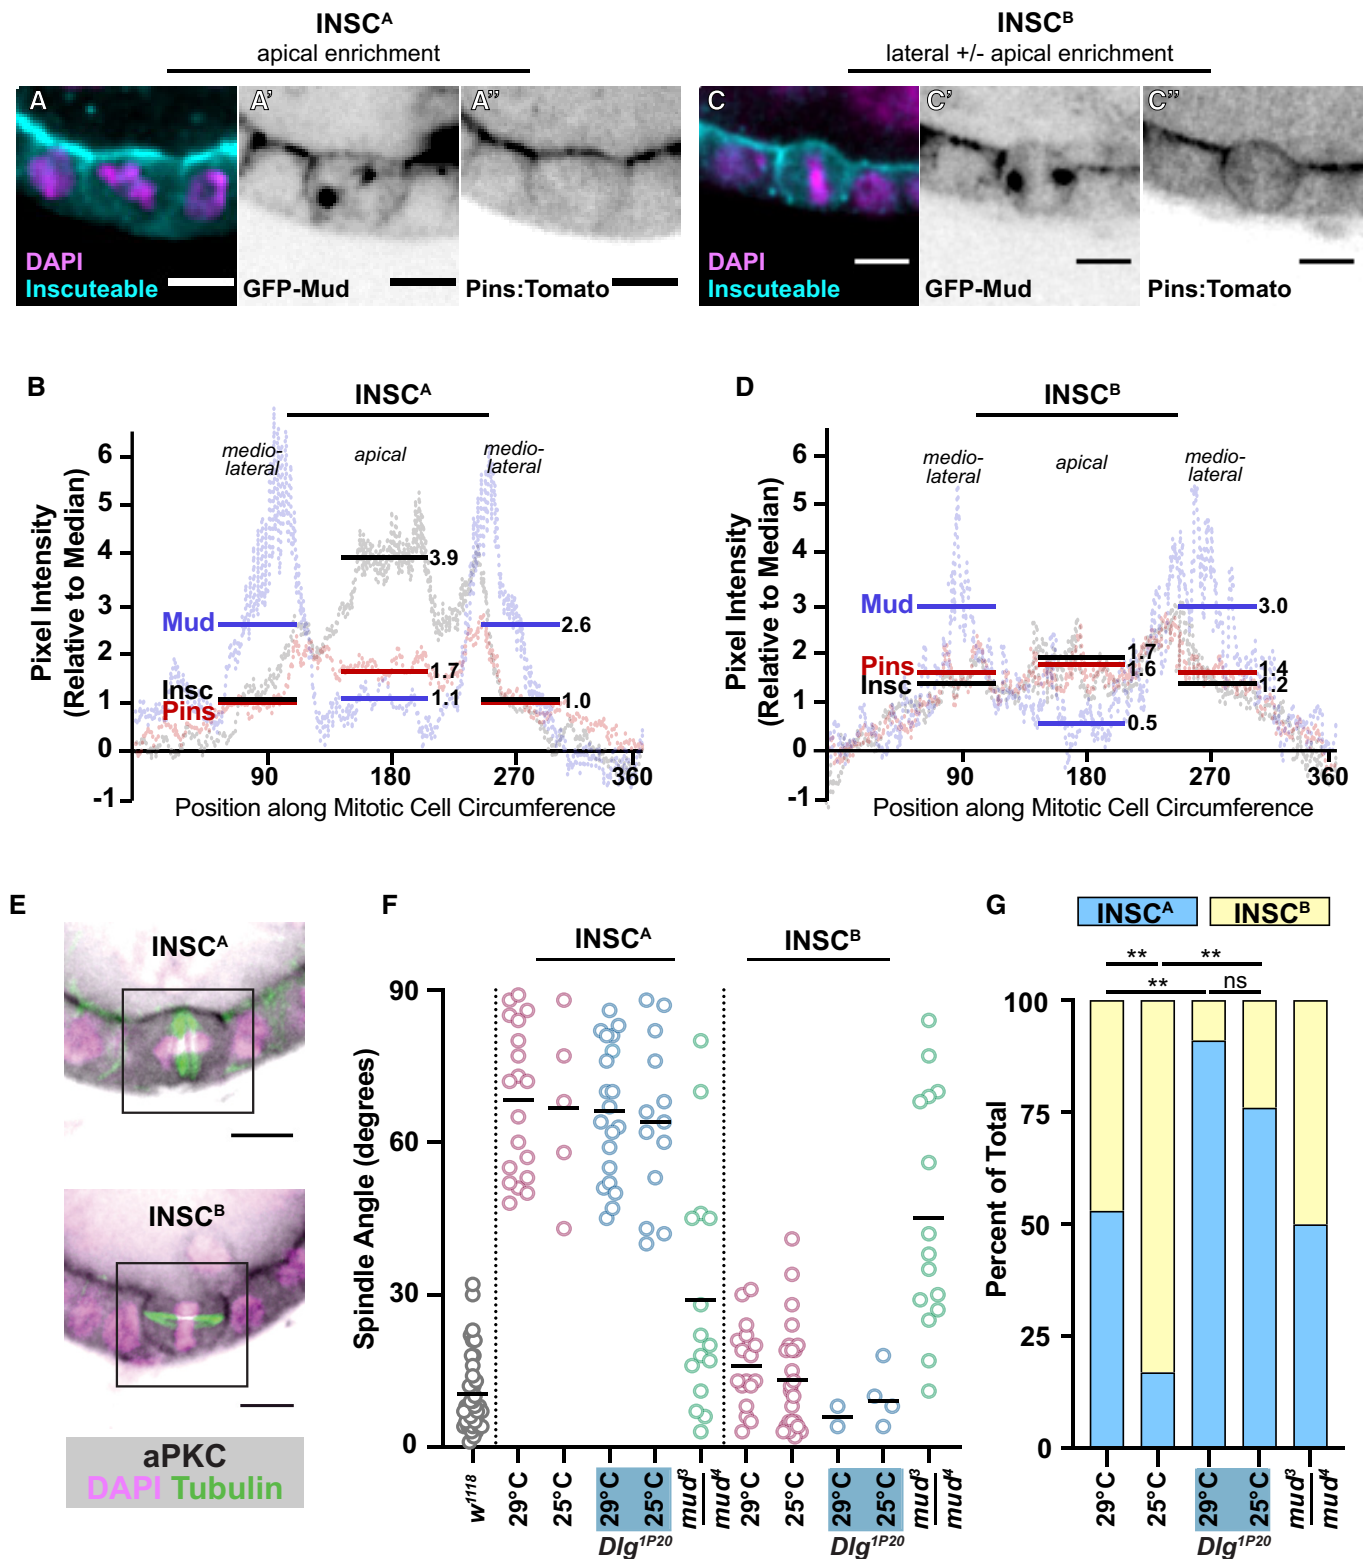

Figure 6.

predictor of spindle orientation in these cells is neither Mud nor Pins, but rather Inscuteable; if it is highly enriched at the apical surface (Insc<sup>A</sup>) spindles are reoriented, but if it is not (Insc<sup>B</sup>) then spindle angles are normal.

Since Mud localization is not an accurate predictor of spindle orientation, whereas Inscuteable is, a possibility to consider is that Inscuteable exerts a Mud-independent effect. However, we find that spindle orientation is randomized in both Insc<sup>A</sup> and Insc<sup>B</sup> cells when

Mud is genetically removed (Fig 6F). This finding indicates that in *Insc<sup>A</sup>* cells *Inscuteable* impacts both the location and the activity of Mud-dependent pulling.

We have already shown that activation of the spindle-orientation machinery in the FE requires *Dlg*, and an obvious possibility is therefore that *Inscuteable* promotes spindle reorientation in *Insc<sup>A</sup>* cells by changing the location of *Dlg*. We have been unable to test this directly because *Dlg* is expressed in germline cells as well as the FE, meaning that it can appear to be apical even in wild type tissue. However, to find out whether *Dlg* is required for *Inscuteable*-mediate spindle orientation we expressed *Inscuteable* in *Dlg<sup>1P20</sup>/Dlg<sup>1P20</sup>* mutant tissue. Not only does *Inscuteable* reorient spindles in this tissue, but the proportion of *Insc<sup>A</sup>* cells is significantly higher at both 29 and 25°C (Figs 6F and G, and EV4C). In other words, *Dlg* acts to shift the threshold towards the *Insc<sup>B</sup>* pattern. We interpret this to mean that interaction between *Pins* and *Dlg*, which is required for spindle orientation, stabilizes the lateral spindle-orientation machinery even if *Dlg* is not a direct anchor.

Taken together with the results described above, these findings show that *Inscuteable* and *Dlg* mediate distinct and competitive mechanisms for activation of the spindle-orienting machinery in follicle cells.

## Discussion

### Limitations of this study

A technical challenge to undertaking this study is that current fluorescent molecules—including those introduced here—are exceedingly weak and liable to photobleaching (*Pins*-myr-GFP is an exception). This issue presents a barrier to live imaging, meaning that temporal resolution is unavailable. We are also unable to convincingly determine whether cortical *Pins* is decreased (as opposed to simply absent), when it is unable to interact with *Dlg*; a decrease is predicted by work in chick embryo neuroepithelial cells showing that a C-terminal fragment of LGN localization is ~ 33% less cortical in the unphosphorylatable condition (Saadaoui et al, 2014). However, we find that even when *Pins* is anchored to the membrane by myristoylation it fails to rescue spindle orientation in *Dlg<sup>1P20</sup>/Dlg<sup>2</sup>* mutant tissue, meaning that a reduction of *Pins* is unlikely to be the only effect responsible for randomization.

Another technical consideration is that our work makes use of transgenes under the control of *Traffic jam*-GAL4. While this strategy allows us to compare our results with previous work employing the same or similar tools, a drawback is that we cannot guarantee that *Traffic jam*-GAL4 drives equivalent expression to the endogenous *Pins* promoter (Chanet et al, 2017, Camuglia et al, 2022). However, given that *Traffic jam*-GAL4 is fairly weak at the developmental stages examined, we are not especially concerned about overexpression effects.

### Additional function for *Pins*?

While it is not a focus for our study, our work provides support for the possibility that *Pins* has an additional function outside of spindle orientation. This is already suggested by the fact that strong mutants of *pins* are lethal to the organism, whereas strong mutants of *mud*

are viable (Schaefer et al, 2000; Yu et al, 2000, 2006). Additionally, in the developing mouse epidermis, the vertebrate ortholog of *Pins* (LGN) acts to promote stratification by facilitating daughter cell placement subsequent to metaphase, perhaps implicating LGN in the regulation of cell–cell adhesion (Lough et al, 2019). We show here that whereas *Mud* expression in the follicular epithelium ends at developmental Stage 6, coinciding with the end of follicle cell divisions, *Pins* continues to be detected past that point (Bergstrahl et al, 2013b). This suggests that *Pins* function is not limited to a role in proliferation. In addition, we find that while the LGN S408D (*Drosophila* 436D) variant is reported to act as a phosphomimetic, this variant does not cause an obvious mutant phenotype in the follicular epithelium (Johnston et al, 2012). What then is the purpose of this modification? Since the phosphosite is highly conserved through metazoans, one possibility to consider is that the phosphorylation regulates the spindle orientation role of *Pins*, whereas unphosphorylated *Pins* plays a different role (Schiller & Bergstrahl, 2021).

### *Dlg* and *Inscuteable* function as distinct activators for the pulling machinery

Previous work, including our own, has concentrated on identifying mechanisms that regulate the position of the spindle-orienting machinery. Work presented here shows that localization of either *Pins* or *Mud* is not always sufficient to predict pulling. Firstly, while *Pins* is required for cortical localization of *Mud* in the follicular epithelium, *Pins* and *Mud* localizations do not strictly overlap, meaning that *Pins* is not an obligate *Mud* anchor. We see evidence for this in wild-type mitotic follicle cells, in which *Pins* appears slightly apical whereas *Mud* does not, and in follicle cells expressing *Inscuteable*, in which the pattern of *Pins* and *Mud* localizations are markedly different. Because cortical localization of *Mud*/*NuMA* has proven difficult to visualize, *Pins* location has been used as a proxy for the position of the entire pulling machinery (Dimitracopoulos et al, 2020). While this may very well be the case in some cell types, our work suggests that it is not a rule that can be automatically applied. Secondly, we find that even *Mud*/*NuMA* localization is not necessarily a reliable predictor for spindle orientation (Fig 6). Although elegant optogenetics work shows that cortical anchoring of *NuMa* is sufficient to direct pulling in unpolarized HeLa cells, we find that in the follicular epithelium at least *Mud* activity must also be regulated by additional factors (Okumura et al, 2018).

One of these factors is *Discs large*. We tested two models for the function of *Dlg* in *Pins*-mediated spindle orientation in the follicular epithelium. The first model, based in part on our own previous work, is that *Dlg* acts as a cortical anchor for *Pins*, and is therefore important for relocalization of *Pins* from the apical to the lateral cortex at mitosis (Bergstrahl et al, 2013b). We now show that this model is incorrect, partly because *Pins* relocalization at mitosis does not require a *Pins*-specific mechanism, but only a membrane anchor. *Gαi* may serve that purpose. The second model is that *Dlg* links *Pins* with *Khc73* or *GUKHolder*. We find that neither molecule is important for spindle orientation in the FE. Our findings indicate that instead of a localization cue or a link to microtubule-capturing factors, *Dlg* acts as an activator for *Pins*-mediated pulling in the follicular epithelium. This mechanism is distinct from and can compete with *Inscuteable*, which

we show here is not only a cortical localization factor for the spindle-orienting machinery but also an activator.

The mechanism of activation remains unclear. While the most straightforward possibility is that Dlg promotes interaction between Pins and Mud, our results show that Mud is recruited to the cortex even when *Dlg* is disrupted (Fig 4D). Alternatively, Discs large may promote a conformational change in the spindle-orientation complex and/or a change in complex composition. Furthermore, the Inscuteable mechanism is not likely to work in the same way. Dlg binds to a conserved phosphosite in the central linker domain of Pins and should therefore allow for Pins to simultaneously interact with Mud (Johnston *et al*, 2009). Contrastingly, binding between Pins and Inscuteable is mediated by the TPR domains of Pins, meaning that Mud is excluded (Culurgioni *et al*, 2011, 2018). While a stable Pins-Inscuteable complex has been suggested to promote localization of a separate Pins-Mud-dynein complex, our work raises the possibility that it might also or instead promote activation.

The finding that there are two distinct mechanisms for activating the spindle-orienting machinery raises the question of how and for what purpose they evolved. Phylogenetic analysis indicates that the interaction between Pins and Dlg is evolutionarily ancient; it is predicted to have evolved in Cnidaria, predating the appearance of Inscuteable orthologs (Schiller & Bergstralh, 2021). It is therefore tempting to speculate that Inscuteable-mediated spindle orientation evolved to promote cell type diversity, particularly in the more complex bilaterian nervous system.

Together, our results show that the canonical model that explains the mitotic spindle orientation is incomplete. Spindle orientation relies not only on the localization, but also on the activation of the pulling machinery.

## Materials and Methods

### *Drosophila* genetics

A list of alleles and transgenes used in this study is found in Table EV1. Genotypes are in Table EV2. We thank the Transgenic RNAi Project at Harvard Medical School (NIH/NIGMS R01-GM084947) for providing shRNA lines. Ectopic protein expression was accomplished using the UAS-GAL4 system (Brand & Perrimon, 1993). Expression was driven by Traffic Jam-GAL4 (Olivieri *et al*, 2010). Mitotic clones of Ubi-Pins-YFP were made by recombining the Ubi-Pins-YFP transgene onto an FRT82B chromosome.

### Molecular biology

Pins:Tomato fly line was generated by cloning the entire pins gene tagged with tdTomato including 3 kb upstream and 2 kb downstream of the coding sequence into a pattB plasmid backbone construct (Bischof *et al*, 2013). tdTomato RFP (Shaner *et al*, 2004) was inserted at the C-terminus of the Pins coding sequence separated by a linker (GGSG), using PCR and Gibson assembly. The sequence map is shown in Appendix Fig S1 and the sequence in Appendix Supplementary Methods. This plasmid was injected into attP2 line Bloomington line 25,710 (outsourced to BestGene *Drosophila* Embryo Injection Services) with 3rd chromosome attP docking site for phiC31 integrase-mediated transformation.

### Mitotic clones

Clones were induced by incubating larvae or pupae at 37°C for two out of every 12 h over a period of at least 2 days. Adult females were dissected at least 2 days after the last heat shock. Flies in which the Gal4-UAS system was used were kept at 29° for 48 h before dissection unless otherwise noted. The following background stocks were used to generate mitotic clones, which were induced by heat shock at 37° for multiple periods of 2 h: RFP-nls, hsf1p, FRT19A and hsf1p;;FRT82B, RFP-nls / TM3,Sb. Mosaic Analysis with a Repressible Cell Marker was carried out using GFP-mCD8 (under control of an actin promoter) as the marker (Lee & Luo, 1999).

### Reagents

A list of reagents used in this study is found in Table EV3.

### Immunostaining

Ovaries were fixed for 15 min in 10% Formaldehyde and 0.2% Tween in Phosphate Buffered Saline (PBS-T). Embryos were fixed for 5 min at the interface of 37% Formaldehyde and 100% Heptane. Embryos were then washed in PBS and PBS-T and the vitelline membrane was removed manually using a sharp needle. Ovaries and embryos were incubated in blocking solution (10% Bovine Serum Albumin in PBS) for about 1 h at room temperature prior to staining. Primary and secondary immunostainings lasted at least 3 h in PBS-T. Three washes of about 10 min each in PBS-T were carried out between stainings and after the secondary staining. Primary and secondary antibodies were used at a concentration of 1:150.

### Imaging

Microscopy was performed using either a Leica SP5 point scanning confocal (63×/1.4 HCX PL Apo CS oil lens) or an Andor Dragonfly Spinning Disk confocal microscope (60× water objective). Images were collected with LAS AF or the Andor Fusion software respectively. Minor processing (Gaussian blur) was performed using FIJI. For live imaging, embryos undergoing germband extension were mounted ventro-laterally between O<sub>2</sub>-permeable membrane (Sartorius) and a glass coverslip in Voltalef oil (Attachem). Embryos were gently squashed such that the ventrolateral ectoderm was flattened.

### Localization quantification

We used FIJI to perform our quantifications. Starting at the center of the basolateral region (which we defined as 0), a freehand line was drawn around the perimeter of the cell and pixel intensity determined at each point along the line. Background signal, measured in the cytoplasm, was subtracted from these points. Intensities were normalized by dividing the median intensity and positions were normalized to a line with a length of 360. The graphical representations show data points from multiple cells (as indicated in the legend) using a floating 10-point average. Measurement of Mud intensity was sometimes complicated by the proximity between spindle poles, which are highly Mud-positive, and the cortex, which is less so. In these instances, the overlapping region was excluded from the measurement. These



exclusions help to explain why Mud intensity profiles are not as smooth as those measured for other proteins.

### Spindle orientation measurements

#### Follicular epithelium

Spindle angle determination was performed as previously described (Finegan et al, 2018). Angles were determined by drawing a first line connecting either the two spindle poles (if applicable) or along the spindle and a second line along the apical surface of the tissue, then measuring the angle between them. Spindle angle values for control  $w^{1118}$  are reused between Figs 1D, 3F, 4C, 5C and 6F, and for  $pins^{p62}/pins^{p62}$  between Figs 3F, 4C and 5C.

#### Embryonic ectoderm

Spindle angles were determined using FIJI by finding the distance between the mitotic spindle poles: (i) in the xy axis of the flattened ventrolateral ectoderm in a sum projection of the confocal z stack; (ii) in z axis by determining the z planes that the 2 poles appear. The mitotic spindle orientation angle,  $\phi$ , was calculated by taking the inverse tan of the difference in z depth divided by the distance in xy between the spindle poles (Fig EV3C and D).

### Statistical analyses

The Mann–Whitney test was used to determine significance when comparing spindle orientation across conditions/genotypes. No statistical method was used to predetermine sample size, the experiments were not randomized, and the investigators were not blinded to allocation during experiments and outcome assessment. The chi-square test of independence was used to determine the significance in Fig 6G.

## Data availability

This study includes no data deposited in external repositories.

**Expanded View** for this article is available [online](#).

### Acknowledgements

We are grateful to the Rochester-Manchester-Carolina Meeting Group, the Rochester Invertebrate Group, Holly Lovegrove, and to Bergstrahl lab members for comments. Rebecca (Becky) Bastock suggested clonal expression of Ubi-Pins-YFP. We thank Allison Zajac (Horne-Badovinac lab), Adam Martin, and Pejmun Haghighi for sharing flies. We extend very warm thanks to Mark Khoury and David Bilder, who provided emergency flies shortly after our lab's 18 degree incubator broke. This work was supported by National Science Foundation CAREER award 2042280 (PI: Bergstrahl) and by National Institutes of Health Grants R01GM125839 (PI: Bergstrahl) and S10 RR024577-01.

### Author contributions

**Kathryn E Neville:** Resources; data curation; methodology. **Tara M Finegan:** Data curation; formal analysis; investigation; visualization; methodology; writing—review and editing. **Nicholas Lowe:** Resources. **Philip M Bellomio:** Resources. **Daxiang Na:** Resources. **Dan T Bergstrahl:** Conceptualization; resources; data curation; formal analysis; supervision; funding acquisition;

investigation; visualization; methodology; writing—original draft; project administration; writing—review and editing.

### Disclosure and competing interests statement

The authors declare that they have no conflict of interest.

## References

- Berger J, Senti KA, Senti G, Newsome TP, Asling B, Dickson BJ, Suzuki T (2008) Systematic identification of genes that regulate neuronal wiring in the *Drosophila* visual system. *PLoS Genet* 4: e1000085
- Bergstrahl DT, Haack T, St Johnston D (2013a) Epithelial polarity and spindle orientation: intersecting pathways. *Philos Trans R Soc Lond B Biol Sci* 368: 20130291
- Bergstrahl DT, Lovegrove HE, St Johnston D (2013b) Discs large links spindle orientation to apical-basal polarity in *Drosophila* epithelia. *Curr Biol* 23: 1707–1712
- Bergstrahl DT, Lovegrove HE, St Johnston D (2015) Lateral adhesion drives reintegration of misplaced cells into epithelial monolayers. *Nat Cell Biol* 17: 1497–1503
- Bergstrahl DT, Lovegrove HE, Kujawiak I, Dawney NS, Zhu J, Cooper S, Zhang R, St Johnston D (2016) Pins is not required for spindle orientation in the *Drosophila* wing disc. *Development* 143: 2573–2581
- Bergstrahl DT, Dawney NS, St Johnston D (2017) Spindle orientation: a question of complex positioning. *Development* 144: 1137–1145
- Bischof J, Björklund M, Furger E, Schertel C, Taipale J, Basler K (2013) A versatile platform for creating a comprehensive UAS-ORFeome library in *Drosophila*. *Development* 140: 2434–2442
- Bosveld F, Markova O, Guirao B, Martin C, Wang Z, Pierre A, Balakireva M, Gauge I, Ainslie A, Christophorou N et al (2016) Epithelial tricellular junctions act as interphase cell shape sensors to orient mitosis. *Nature* 530: 495–498
- Bowman SK, Neumüller RA, Novatchkova M, Du Q, Knoblich JA (2006) The *Drosophila* NuMA homolog mud regulates spindle orientation in asymmetric cell division. *Dev Cell* 10: 731–742
- Brand AH, Perrimon N (1993) Targeted gene expression as a means of altering cell fates and generating dominant phenotypes. *Development* 118: 401–415
- Camuglia J, Chanet S, Martin AC (2022) Morphogenetic forces planar polarize LGN/Pins in the embryonic head during *Drosophila* gastrulation. *Elife* 11: e78779
- Carminati M, Gallini S, Pirovano L, Alfieri A, Bisi S, Mapelli M (2016) Concomitant binding of Afadin to LGN and F-Actin directs planar spindle orientation. *Nat Struct Mol Biol* 23: 155–163
- Chanet S, Sharan R, Khan Z, Martin AC (2017) Myosin 2-induced mitotic rounding enables columnar epithelial cells to interpret cortical spindle positioning cues. *Curr Biol* 27: 3350–3358.e3
- Chugh P, Paluch EK (2018) The actin cortex at a glance. *J Cell Sci* 131: jcs.186254
- Culurgioni S, Alfieri A, Pendolino V, Laddomada F, Mapelli M (2011) Inscuteable and NuMA proteins bind competitively to Leu-Gly-Asn repeat-enriched protein (LGN) during asymmetric cell divisions. *Proc Natl Acad Sci U S A* 108: 20998–21003
- Culurgioni S, Mari S, Bonetti P, Gallini S, Bonetto G, Brennich M, Round A, Nicassio F, Mapelli M (2018) Insc:LGN tetramers promote asymmetric divisions of mammary stem cells. *Nat Commun* 9: 1025
- David NB, Martin CA, Segalen M, Rosenfeld F, Schweisguth F, Bellaïche Y (2005) *Drosophila* Ric-8 regulates Galphai cortical localization to promote

- Galphai-dependent planar orientation of the mitotic spindle during asymmetric cell division. *Nat Cell Biol* 7: 1083–1090
- Dimitracopoulos A, Srivastava P, Chaigne A, Win Z, Schlomovitz R, Lancaster OM, Le Berre M, Piel M, Franze K, Salbreux G et al (2020) Mechanochemical crosstalk produces cell-intrinsic patterning of the cortex to orient the mitotic spindle. *Curr Biol* 30: 3687–3696.e4
- Du Q, Stukenberg PT, Macara IG (2001) A mammalian Partner of inscuteable binds NuMA and regulates mitotic spindle organization. *Nat Cell Biol* 3: 1069–1075
- Egger B, Boone JQ, Stevens NR, Brand AH, Doe CQ (2007) Regulation of spindle orientation and neural stem cell fate in the *Drosophila* optic lobe. *Neural Dev* 2: 1
- Finegan TM, Na D, Cammarota C, Skeeters AV, Nádasi TJ, Dawney NS, Fletcher AG, Oakes PW, Bergstralh DT (2018) Tissue tension and not interphase cell shape determines cell division orientation in the *Drosophila* follicular epithelium. *EMBO J* 38: e100072
- Gloerich M, Bianchini JM, Siemers KA, Cohen DJ, Nelson WJ (2017) Cell division orientation is coupled to cell-cell adhesion by the E-cadherin/LGN complex. *Nat Commun* 8: 13996
- Golub O, Wee B, Newman RA, Paterson NM, Prehoda KE (2017) Activation of discs large by aPKC aligns the mitotic spindle to the polarity axis during asymmetric cell division. *Elife* 6: e32137
- Hao Y, Du Q, Chen X, Zheng Z, Balsbaugh JL, Maitra S, Shabanowitz J, Hunt DF, Macara IG (2010) Par3 controls epithelial spindle orientation by aPKC-mediated phosphorylation of apical pins. *Curr Biol* 20: 1809–1818
- Izumi Y, Ohta N, Hisata K, Raabe T, Matsuzaki F (2006) *Drosophila* pins-binding protein mud regulates spindle-polarity coupling and centrosome organization. *Nat Cell Biol* 8: 586–593
- Johnston CA, Hirono K, Prehoda KE, Doe CQ (2009) Identification of an Aurora-a/PinsLINKER/Dlg spindle orientation pathway using induced cell polarity in S2 cells. *Cell* 138: 1150–1163
- Johnston CA, Doe CQ, Prehoda KE (2012) Structure of an enzyme-derived phosphoprotein recognition domain. *PLoS One* 7: e36014
- Kiyomitsu T, Cheeseman IM (2013) Cortical dynein and asymmetric membrane elongation coordinately position the spindle in anaphase. *Cell* 154: 391–402
- Kotak S, Busso C, Gönczy P (2013) NuMA phosphorylation by CDK1 couples mitotic progression with cortical dynein function. *EMBO J* 32: 2517–2529
- Kraut R, Chia W, Jan LY, Jan YN, Knoblich JA (1996) Role of inscuteable in orienting asymmetric cell divisions in *Drosophila*. *Nature* 383: 50–55
- Lee T, Luo L (1999) Mosaic analysis with a repressible cell marker for studies of gene function in neuronal morphogenesis. *Neuron* 22: 451–461
- Liao EH, Gray L, Tsurudome K, El-Mounzer W, Elazzouzi F, Baim C, Farzin S, Calderon MR, Kauwe G, Haghighi AP (2018) Kinesin Khc-73/KIF13B modulates retrograde BMP signaling by influencing endosomal dynamics at the *Drosophila* neuromuscular junction. *PLoS Genet* 14: e1007184
- Lough KJ, Byrd KM, Descovich CP, Spitzer DC, Bergman AJ, Beaudoin GMJ, Reichardt LF, Williams SE (2019) Telophase correction refines division orientation in stratified epithelia. *eLife* 8: e49249
- Lovegrove HE, Bergstralh DT, St Johnston D (2019) The role of integrins in *Drosophila* egg chamber morphogenesis. *Development* 146: dev182774
- Lu MS, Prehoda KE (2013) A NudE/14-3-3 pathway coordinates dynein and the kinesin Khc73 to position the mitotic spindle. *Dev Cell* 26: 369–380
- Lucas EP, Raff JW (2007) Maintaining the proper connection between the centrosomes and the pericentriolar matrix requires *Drosophila* centrosomin. *J Cell Biol* 178: 725–732
- Morais-de-Sá E, Sunkel C (2013) Adherens junctions determine the apical position of the midbody during follicular epithelial cell division. *EMBO Rep* 14: 696–703
- Morin X, Bellaïche Y (2011) Mitotic spindle orientation in asymmetric and symmetric cell divisions during animal development. *Dev Cell* 21: 102–119
- Nakajima YI, Lee ZT, McKinney SA, Swanson SK, Florens L, Gibson MC (2019) Junctional tumor suppressors interact with 14-3-3 proteins to control planar spindle alignment. *J Cell Biol* 218: 1824–1838
- Okumura M, Natsume T, Kanemaki MT, Kiyomitsu T (2018) Dynein–dynactin–NuMA clusters generate cortical spindle-pulling forces as a multi-arm ensemble. *Elife* 7: e36559
- Olivieri D, Sykora MM, Sachidanandam R, Mechtler K, Brennecke J (2010) An *in vivo* RNAi assay identifies major genetic and cellular requirements for primary piRNA biogenesis in *Drosophila*. *EMBO J* 29: 3301–3317
- Perkins LA, Holderbaum L, Tao R, Hu Y, Sopko R (2015) The transgenic RNAi project at Harvard Medical School: resources and validation. *Genetics* 201: 843–852
- Perrimon N (1988) The maternal effect of lethal(1)discs-large-1: a recessive oncogene of *Drosophila melanogaster*. *Dev Biol* 127: 392–407
- di Pietro F, Echard A, Morin X (2016) Regulation of mitotic spindle orientation: an integrated view. *EMBO Rep* 17: 1106–1130
- Saadaoui M, Machicoane M, di Pietro F, Etoc F, Echard A, Morin X (2014) Dlg1 controls planar spindle orientation in the neuroepithelium through direct interaction with LGN. *J Cell Biol* 206: 707–717
- Schaefer M, Shevchenko A, Knoblich JA (2000) A protein complex containing Inscuteable and the Galphai-binding protein pins orients asymmetric cell divisions in *Drosophila*. *Curr Biol* 10: 353–362
- Schiller EA, Bergstralh DT (2021) Interaction between discs large and pins/LGN/GPSM2: a comparison across species. *Biol Open* 10: bio058982
- Segalen M, Johnston CA, Martin CA, Dumortier JG, Prehoda KE, David NB, Doe CQ, Bellaïche Y (2010) The Fz-Dsh planar cell polarity pathway induces oriented cell division via mud/NuMA in *Drosophila* and zebrafish. *Dev Cell* 19: 740–752
- Seldin L, Poulson ND, Foote HP, Lechler T (2013) NuMA localization, stability, and function in spindle orientation involve 4.1 and Cdk1 interactions. *Mol Biol Cell* 24: 3651–3662
- Shaner NC, Campbell RE, Steinbach PA, Giepmans BNG, Palmer AE, Tsien RY (2004) Improved monomeric red, orange and yellow fluorescent proteins derived from *Discosoma* sp. red fluorescent protein. *Nat Biotechnol* 22: 1567–1572
- Siegrist SE, Doe CQ (2005) Microtubule-induced pins/Galphai cortical polarity in *Drosophila* neuroblasts. *Cell* 123: 1323–1335
- Siller KH, Doe CQ (2009) Spindle orientation during asymmetric cell division. *Nat Cell Biol* 11: 365–374
- Siller KH, Cabernard C, Doe CQ (2006) The NuMA-related mud protein binds pins and regulates spindle orientation in *Drosophila* neuroblasts. *Nat Cell Biol* 8: 594–600
- Werts AD, Goldstein B (2011) How signaling between cells can orient a mitotic spindle. *Semin Cell Dev Biol* 22: 842–849
- Wodarz A, Ramrath A, Kuchinke U, Knust E (1999) Bazooka provides an apical cue for Inscuteable localization in *Drosophila* neuroblasts. *Nature* 402: 544–547
- Wodarz A, Ramrath A, Grimm A, Knust E (2000) *Drosophila* atypical protein kinase C associates with bazooka and controls polarity of epithelia and neuroblasts. *J Cell Biol* 150: 1361–1374
- Woods DF, Bryant PJ (1989) Molecular cloning of the lethal(1)discs large-1 oncogene of *Drosophila*. *Dev Biol* 134: 222–235

- Yu F, Morin X, Cai Y, Yang X, Chia W (2000) Analysis of partner of inscuteable, a novel player of *Drosophila* asymmetric divisions, reveals two distinct steps in inscuteable apical localization. *Cell* 100: 399–409
- Yu JX, Guan Z, Nash HA (2006) The mushroom body defect gene product is an essential component of the meiosis II spindle apparatus in *Drosophila* oocytes. *Genetics* 173: 243–253
- Zajac AL, Horne-Badovinac S (2022) Kinesin-directed secretion of basement membrane proteins to a subdomain of the basolateral surface in *Drosophila* epithelial cells. *Curr Biol* 32: 735–748.e10
- Zhao T, Graham OS, Raposo A, St Johnston D (2012) Growing microtubules push the oocyte nucleus to polarize the *Drosophila* dorsal-ventral axis. *Science* 336: 999–1003
- Zheng Z, Wan Q, Meixiong G, Du Q (2014) Cell cycle-regulated membrane binding of NuMA contributes to efficient anaphase chromosome separation. *Mol Biol Cell* 25: 606–619
- Zhu J, Shang Y, Xia C, Wang W, Wen W, Zhang M (2011) Guanylate kinase domains of the MAGUK family scaffold proteins as specific phospho-protein-binding modules. *EMBO J* 30: 4986–4997

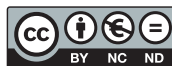

**License:** This is an open access article under the terms of the [Creative Commons Attribution-NonCommercial-NoDerivs](#) License, which permits use and distribution in any medium, provided the original work is properly cited, the use is non-commercial and no modifications or adaptations are made.

## Expanded View Figures

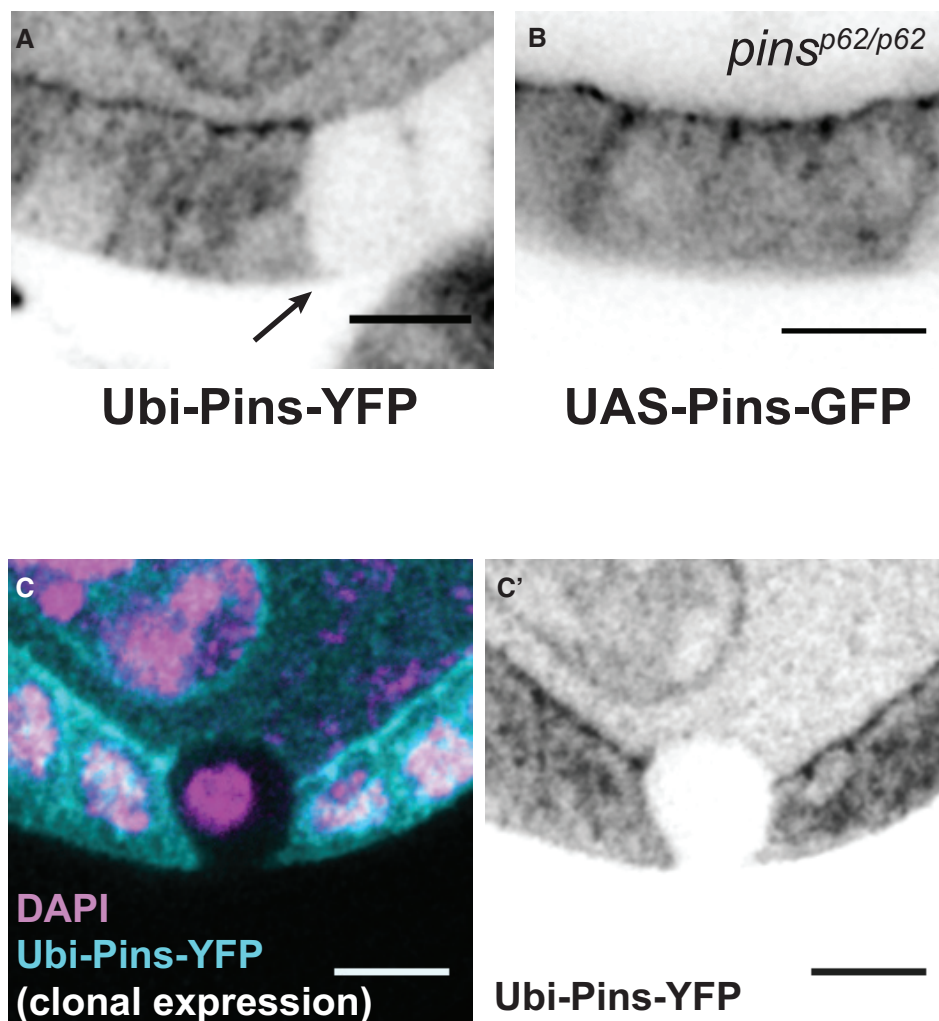

**Figure EV1.** Pins signal at the border between interior germline and exterior follicle cells reflects apical localization in follicle cells—Related to Fig 2.

- A Clonal expression of Ubi-Pins-YFP shows that most signal at the border between germline and follicle cells originates in the follicle epithelium. The arrow marks the clone border.
- B Pins-GFP appears at the apical surface when expressed only in the follicle epithelium.
- C Clonal expression of Ubi-Pins-YFP shows that signal at the border between the germline and a mitotic follicle cell originates primarily in the mitotic cell. In this field of view, only the mitotic cell lacks expression of Ubi-Pins-YFP.

Data information: scale bars = 5 microns.



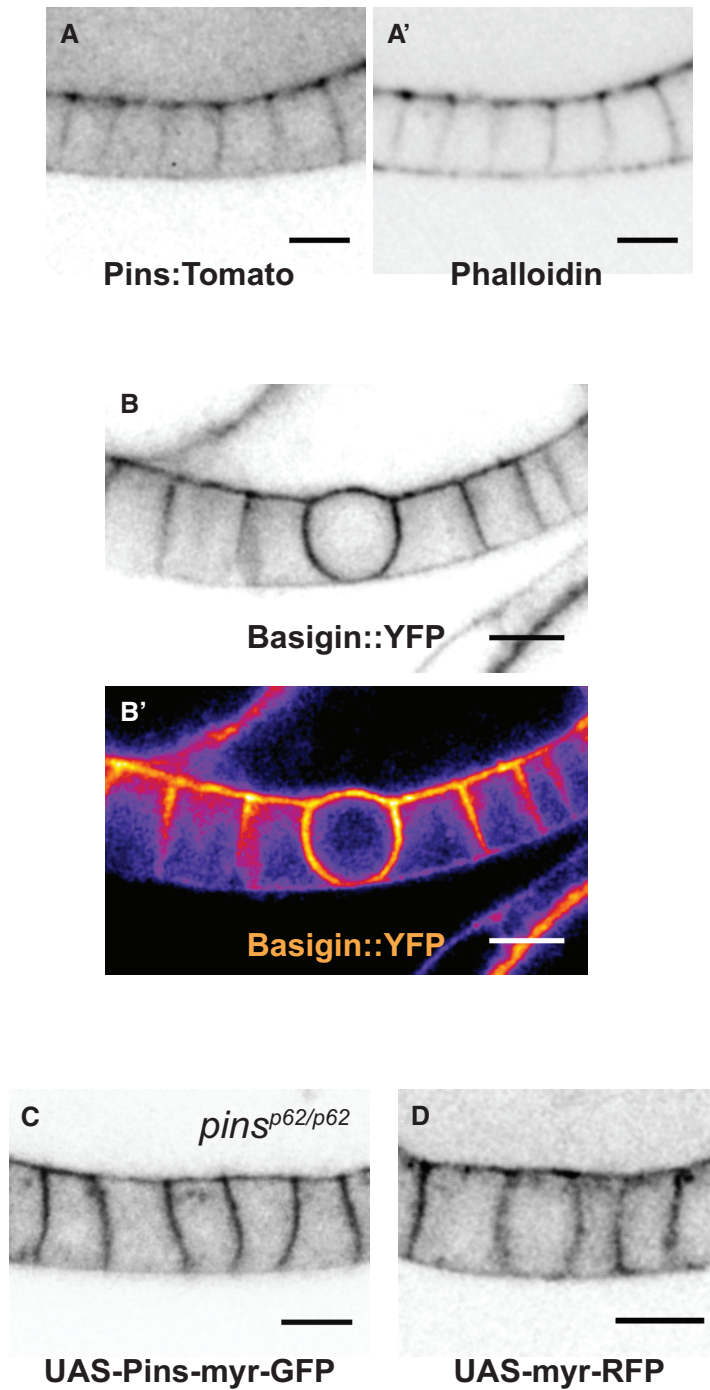

**Figure EV2. Localization of cortical proteins in the follicular epithelium—Related to Fig 3.**

- A** Pins:Tom and actin overlap at the apical and lateral cortex during interphase.
- B** Basigin::YFP is enriched in a mitotic cell. Both a b/w and heat map image are shown to highlight enrichment. The protein can be found at the borders of germline and follicle cells.
- C, D** UAS-myr-Pins-GFP (**C**) and UAS-myr-RFP localization (**D**) show similar localization in interphase follicle cells. Scale bars = 5 microns.

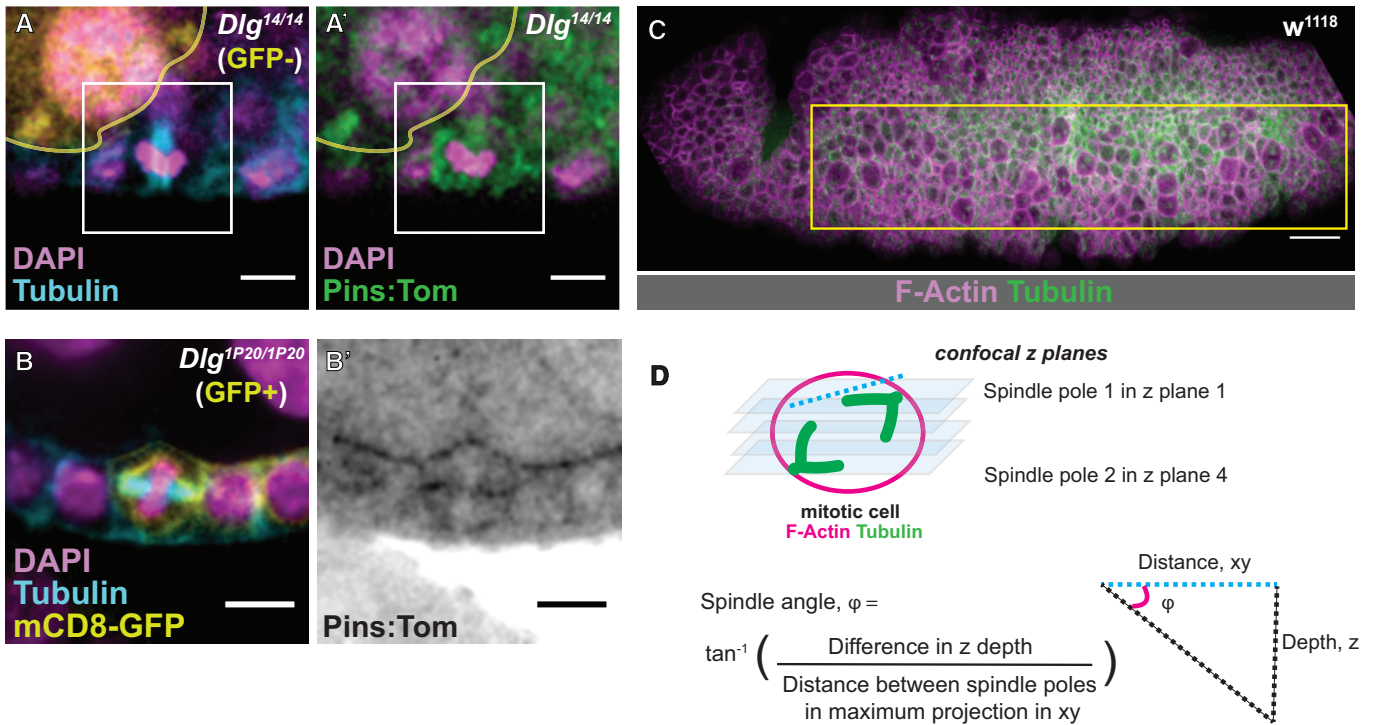

**Figure EV3. Dlg is not required for cortical localization of Pins and explanation of the method of spindle angle measurements in the embryo—Related to Fig 4.**

Pins:Tom is observed at the cell cortex in:

- A A mitotic *Dlg*<sup>14</sup>/*Dlg*<sup>14</sup> cell and  
B A mitotic *Dlg*<sup>1P20</sup>/*Dlg*<sup>1P20</sup> cell. For the former, mutant tissue is marked by the absence of RFP. For the latter, mutant tissue is marked by the presence of mCD8-GFP.  
Scale bars = 5 microns (A, B).  
C The region of the ventrolateral embryonic ectoderm used to quantify spindle angles from a representative fixed and immunostained embryo. Scale bar = 20 microns.  
D A schematic showing the method to determine the spindle angle of mitotic cells in the early embryonic ectoderm, described in the Materials and Methods.

**Figure EV4. Insc<sup>A</sup> and Insc<sup>B</sup> cells are distinguished by the pattern of Inscuteable localization—Related to Fig 6.**

- A In Insc<sup>A</sup> cells, Inscuteable is strongly enriched at the apical surface.  
B Insc<sup>B</sup> cells show a stronger enrichment of Inscuteable at lateral surfaces. In an extreme example, Inscuteable is only lateral.  
C Mitotic spindle reorientation in a *Dlg*<sup>1P20</sup>/*Dlg*<sup>1P20</sup> cell expressing Inscuteable. Quantification in Fig 6F.  
D As a complementary visualization strategy to that provided in Fig 6B and D, we divided the relative signal intensity data for Mud, Pins, and Insc in Insc<sup>A</sup> and Insc<sup>B</sup> cells into bins of 15 degrees each. Box plot central bands = mean, whiskers = standard deviation. These data are presented here side-by-side for each protein in the two conditions. Only the intensity of Inscuteable showed a statistical difference (as determined by ANOVA) between Insc<sup>A</sup> and Insc<sup>B</sup> cells. Quantification from Insc<sup>A</sup>: 5 cells, Insc<sup>B</sup>: 7 cells (biological replicates).

Data information: scale bars = 5 microns (A–C).

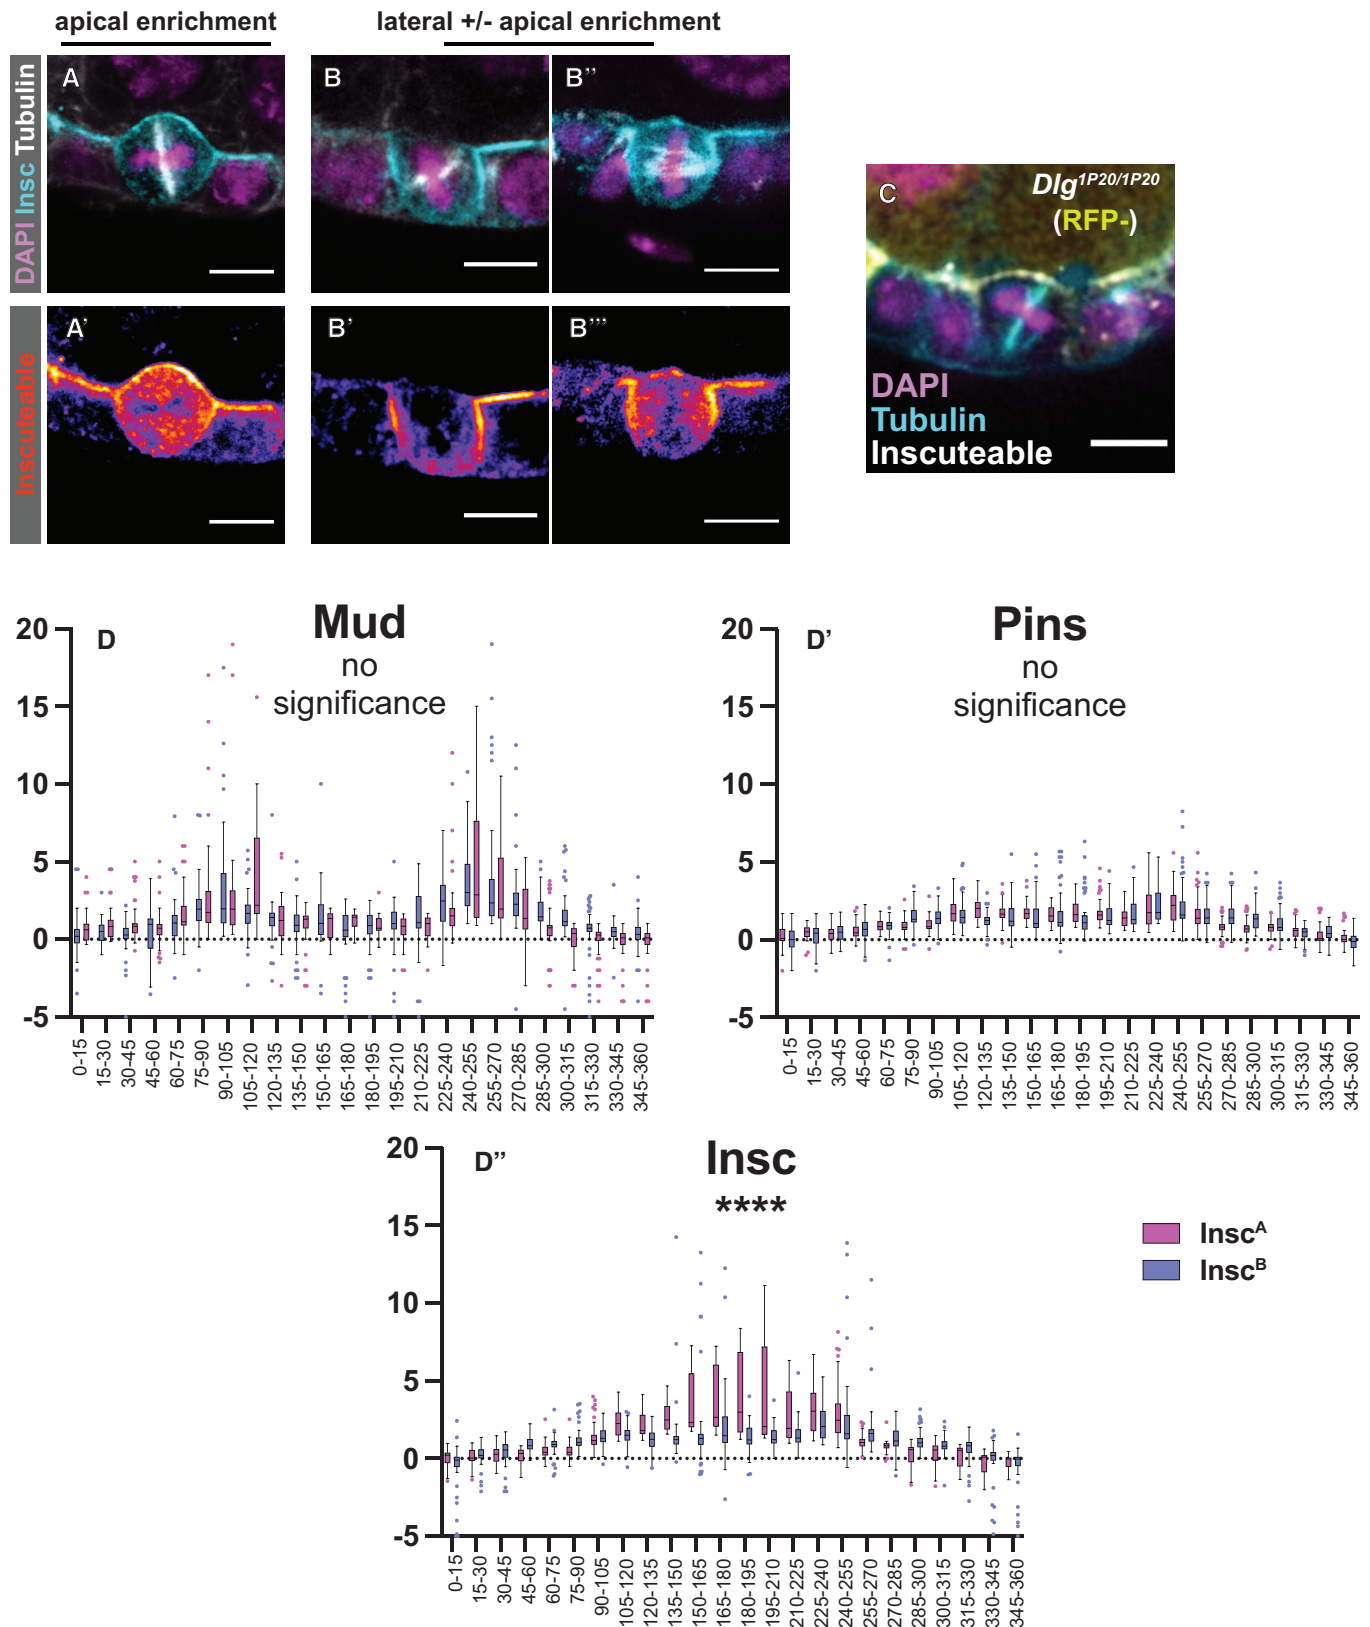

Figure EV4.
